# Supplementary material
Source: PubMed Central journal article supplement (PMC6217937)
Supplement: NIHMS79355-supplement-Supplementary_Information.pdf [file NIHMS79355-supplement-Supplementary_Information.pdf]

## SUPPLEMENTARY INFORMATION

### **Cellular location of endo-acting galactanases confers keystone or recipient status to arabinogalactan degrading bacteria of the human gut microbiota**

Alan Cartmell<sup>1¶</sup>, Jose Muñoz-Muñoz<sup>1¶</sup>, Jonathon Briggs<sup>1¶</sup>, Didier A. Ndeh<sup>1¶</sup>, Elisabeth C. Lowe<sup>1</sup>, Arnaud Baslé<sup>1</sup>, Nicolas Terrapon<sup>2</sup>, Katherine Stott<sup>3</sup>, Tiaan Heunis<sup>1</sup>, Joe Gray<sup>1</sup>, Li Yu<sup>3</sup>, Paul Pearl Z. Fernandes<sup>4</sup>, Sayali Shah<sup>4</sup>, Spencer J. Williams<sup>4</sup>, Aurore Labourel<sup>1</sup>, Matthias Trott<sup>1</sup>, Bernard Henrissat<sup>2,5,6</sup> and Harry J. Gilbert<sup>1,\*</sup>

**Supplementary Table 1 Annotation and activity of potential enzymes encoded by PUL<sub>AGPL</sub> and PUL<sub>AGPS</sub>**

|                           | <b>Annotation</b>                                | <b>Recombinant expression?</b> | <b>Active on LA-or GA-AGP</b> | <b>Other Comment</b>               |
|---------------------------|--------------------------------------------------|--------------------------------|-------------------------------|------------------------------------|
| <b>PUL<sub>AGPL</sub></b> |                                                  |                                |                               |                                    |
| BT0262                    | hypothetical protein                             | Yes                            | No                            |                                    |
| BT0263                    | PL27                                             | Yes                            | Yes                           | Rhamno-galaturonyl lyase           |
| BT0264                    | GH43_24                                          | Yes                            | Yes                           | Endo-β1,3-galactanase              |
| BT0265                    | GH43_24                                          | Yes                            | Yes                           | Exo-β1,3-galactosidase             |
| BT0266                    | hypothetical protein                             | Yes                            | No                            |                                    |
| BT0267                    | HTCS                                             | Yes                            | No                            |                                    |
| BT0268                    | SusC                                             | No                             |                               |                                    |
| BT0269                    | SusD                                             | No                             |                               |                                    |
| BT0270                    | hypothetical protein                             | Yes                            | No                            |                                    |
| BT0271                    | hypothetical protein(DUF5007)                    | Yes                            | No                            |                                    |
| BT0272                    | SusC                                             | No                             |                               |                                    |
| BT0273                    | SusD                                             | No                             |                               |                                    |
| BT0274                    | hypothetical protein(Fasciclin)                  | Yes                            | No                            |                                    |
| BT0275                    | hypothetical protein(DUF5008, DUF5124, DUF5122 ) | Yes                            | No                            |                                    |
| BT0276                    | hypothetical protein(Laminin_G_3)                | Yes                            | No                            |                                    |
| BT0277                    | M60-like Peptidase, CBM32                        | Yes                            | No                            | Lacks catalytic residue            |
| BT0278                    | Type I phosphodiesterase                         | Yes                            | No                            |                                    |
| BT0279                    | Hypothetical protein                             | Yes                            | No                            |                                    |
| BT0280                    | Transposase                                      | Yes                            | No                            |                                    |
| BT0284                    | peptidoglycan binding protein                    | Yes                            | No                            |                                    |
| BT0285                    | tolQ-type transport protein (MotA_ExbB)          | Yes                            | No                            |                                    |
| BT0290                    | GH35, CBM32                                      | Yes                            | Yes                           | Exo-β1,6-galactosidase             |
| <b>PUL<sub>AGPS</sub></b> |                                                  |                                |                               |                                    |
| BT3674                    | GH127                                            | Yes                            | Yes                           | β-L-arabinofuranosidase            |
| BT3675                    | GH43_34                                          | Yes                            | Yes                           | α-L-arabinofuranosidase            |
| BT3676                    | BNR repeat-containing family member              | Yes                            | No                            |                                    |
| BT3677                    | hypothetical protein(DUF2264)                    | Yes                            | Yes                           | New family β-glucuronidase         |
| BT3678                    | HTCS                                             | Yes                            | No                            | Sensor not soluble.                |
| BT3679                    | hypothetical protein(IPT/TIG domain)             | Yes                            | Yes                           | New family α-L-arabinofuranosidase |
| BT3680                    | SusC                                             | No                             |                               |                                    |
| BT3681                    | SusD                                             | No                             |                               |                                    |
| BT3682                    | hypothetical protein(DUF1735, DUF4973, DUF4361)  | Yes                            | No                            |                                    |
| BT3683                    | GH43_24-GH16                                     | Yes                            | Yes                           | Exo-β1,3-galactosidase             |
| BT3685                    | GH43_24                                          | Yes                            | Yes                           | Exo-β1,3-galactosidase             |
| BT3686                    | GH145                                            | Yes                            | Yes                           | Exo-α-L-rhamnosidase               |
| BT3687                    | GH105                                            | Yes                            | Yes                           | Unsaturated β-glucuronidase        |

**Supplementary Table 2 Kinetic parameters of enzymes active against AGPs.**

|                               | $k_{cat}$ ( $\text{min}^{-1}$ ) | $K_m$ (mM)       | $k_{cat}/K_m$ ( $\text{min}^{-1}\text{M}^{-1}$ ) |
|-------------------------------|---------------------------------|------------------|--------------------------------------------------|
| <b>BT0264 (GH43_24)</b>       |                                 |                  |                                                  |
| $\beta$ -1,3 Gal <sub>2</sub> | - <sup>a</sup>                  | -                | Inactive                                         |
| $\beta$ -1,4 Gal <sub>2</sub> | -                               | -                | Not tested                                       |
| $\beta$ -1,6 Gal <sub>2</sub> | -                               | -                | Inactive                                         |
| <b>BT0265 (GH43_24)</b>       |                                 |                  |                                                  |
| $\beta$ -1,3 Gal <sub>2</sub> | -                               | -                | $(4.2 \pm 0.32) \times 10^3$                     |
| $\beta$ -1,4 Gal <sub>2</sub> | -                               | -                | Inactive                                         |
| $\beta$ -1,6 Gal <sub>2</sub> | -                               | -                | Inactive                                         |
| <b>BT0290 (GH35)</b>          |                                 |                  |                                                  |
| Larch Wood                    | -                               | -                | $(5.5 \pm 0.1) \times 10^6$                      |
| $\beta$ -1,3-galactobiose     | -                               | -                | $(4.9 \pm 0.2) \times 10^3$                      |
| $\beta$ -1,6-galactobiose     | -                               | -                | $(1.4 \pm 0.1) \times 10^6$                      |
| <b>BT3674 (GH127)</b>         |                                 |                  |                                                  |
| LA-AGP                        | $124.3 \pm 10.8$                | $12.10 \pm 2.1$  | $(1.1 \pm 0.4) \times 10^5$                      |
| GA-AGP                        | -                               | -                | $(1.34 \pm 0.4) \times 10^3$                     |
| <b>BT3675 (GH43)</b>          |                                 |                  |                                                  |
| GA-AGP                        | -                               | -                | $(4.77 \pm 0.9) \times 10^5$                     |
| <b>BT3677</b>                 |                                 |                  |                                                  |
| GA-AGP                        | $38.36 \pm 2.32$                | $1.35 \pm 0.21$  | $(2.8 \pm 1.1) \times 10^5$                      |
| GlcA-Gal-Gal                  | -                               | -                | $(4.1 \pm 0.2) \times 10^5$                      |
| <b>BT3679</b>                 |                                 |                  |                                                  |
| LA-AGP                        | -                               | -                | $(5.3 \pm 0.4) \times 10^5$                      |
| GA-AGP                        | -                               | -                | $(2.4 \pm 0.1) \times 10^5$                      |
| Wheat Arabinoxylan            | -                               | -                | $(8.5 \pm 0.7) \times 10^4$                      |
| Sugar beet Arabinan           | $105.7 \pm 16.2$                | $274.5 \pm 23.5$ | $(3.9 \pm 0.4) \times 10^5$                      |
| 1,5- $\alpha$ -Arabinobiose   | -                               | -                | $(1.6 \pm 0.1) \times 10^5$                      |
| <b>BT3683 (GH43_24)</b>       |                                 |                  |                                                  |
| $\beta$ -1,3 Gal <sub>2</sub> | -                               | -                | $(9.7 \pm 2.2) \times 10^2$                      |
| $\beta$ -1,4 Gal <sub>2</sub> | -                               | -                | Inactive                                         |
| $\beta$ -1,6 Gal <sub>2</sub> | -                               | -                | Inactive                                         |
| <b>BT3685 (GH43_24)</b>       |                                 |                  |                                                  |
| $\beta$ -1,3 Gal <sub>2</sub> | -                               | -                | $(2.3 \pm 0.23) \times 10^6$                     |
| $\beta$ -1,4 Gal <sub>2</sub> | -                               | -                | Inactive                                         |
| $\beta$ -1,6 Gal <sub>2</sub> | -                               | -                | Inactive                                         |

<sup>a</sup>: kinetic parameter not determined.

All kinetic parameters are +/- S.E.M . The values were determined from technical replicates n = 3.

**Supplementary Table 3 Kinetic parameters of mutants of the GH43\_24 module in BT3683 and BT3685.**

| Enzyme                                           | $\beta$ -1,3 Gal <sub>2</sub>                                        | 2,4-DNP- $\beta$ -Gal        |
|--------------------------------------------------|----------------------------------------------------------------------|------------------------------|
|                                                  | Catalytic efficiency ( $k_{cat}/K_m \text{ min}^{-1}\text{M}^{-1}$ ) |                              |
| <b>BT3683 wild type</b>                          | $(9.7 \pm 2.2) \times 10^2$                                          | $(6.8 \pm 0.9) \times 10^2$  |
| GH43 module Q577A<br>(catalytic base)            | Inactive                                                             | Inactive                     |
| GH43 module Q577N                                | Inactive                                                             | Inactive                     |
| GH43 module Q577E                                | Inactive                                                             | Inactive                     |
| GH43 module E367A<br>(O4 specificity)            | Inactive                                                             | Inactive                     |
| GH43 module E367Q                                | Trace activity                                                       | $(2.7 \pm 0.3) \times 10^1$  |
| GH43 module D471A (pK <sub>a</sub><br>modulator) | Inactive                                                             | Inactive                     |
| GH43 module D471N                                | Inactive                                                             | Inactive                     |
| GH43 module E520A<br>(catalytic acid)            | Inactive                                                             | $(4.0 \pm 0.5) \times 10^2$  |
| GH43 module E520Q                                | $(2.7 \pm 0.3) \times 10^3$                                          | $(7.5 \pm 0.9) \times 10^2$  |
| GH43 module E319A                                | $(6.6 \pm 0.7) \times 10^2$                                          | - <sup>a</sup>               |
| GH43 module E319Q                                | $(3.5 \pm 0.05) \times 10^3$                                         | -                            |
| GH43 module R321A                                | $(1.8 \pm 0.15) \times 10^2$                                         | -                            |
| GH43 module R321K                                | $(2.3 \pm 0.15) \times 10^2$                                         | -                            |
| GH43 module F326A                                | $(1.0 \pm 0.04) \times 10^4$                                         | -                            |
| GH43 module Y393F                                | $(2.2 \pm 0.14) \times 10^2$                                         | -                            |
| GH43 module S487A                                | $(2.6 \pm 0.12) \times 10^3$                                         | -                            |
| GH43 module S487V                                | $(2.3 \pm 0.33) \times 10^3$                                         | -                            |
| GH43 module C538A                                | $(3.2 \pm 0.14) \times 10^2$                                         | -                            |
| GH16 module E150A<br>(catalytic nucleophile)     | $(1.2 \pm 0.06) \times 10^3$                                         | -                            |
| GH16 module E155A<br>(catalytic acid/base)       | $(7.6 \pm 0.08) \times 10^2$                                         | -                            |
| <b>BT3685 wild type</b>                          | $(2.28 \pm 0.23) \times 10^6$                                        | $(9.8 \pm 0.69) \times 10^4$ |
| Q282A (catalytic base)                           | $(2.41 \pm 0.38) \times 10^3$                                        | $(4.5 \pm 1.0) \times 10^3$  |
| Q282N                                            | Inactive                                                             | $(1.5 \pm 0.31) \times 10^3$ |
| Q282E                                            | $(3.1 \pm 0.56) \times 10^3$                                         | $(3.4 \pm 0.67) \times 10^2$ |
| E121A (O4 specificity)                           | No Expression                                                        | No Expression                |
| E121Q                                            | No Expression                                                        | No Expression                |
| D176A (pK <sub>a</sub> modulator)                | No Expression                                                        | No Expression                |
| D176N                                            | Inactive                                                             | $(8.8 \pm 0.23) \times 10^1$ |
| E225A (catalytic acid)                           | Inactive                                                             | Inactive                     |
| E225Q                                            | Inactive                                                             | $(6.2 \pm 0.15) \times 10^4$ |

<sup>a</sup>: activity not determined.

All kinetic parameters are +/- S.E.M . The values were determined from technical replicates n = 3.

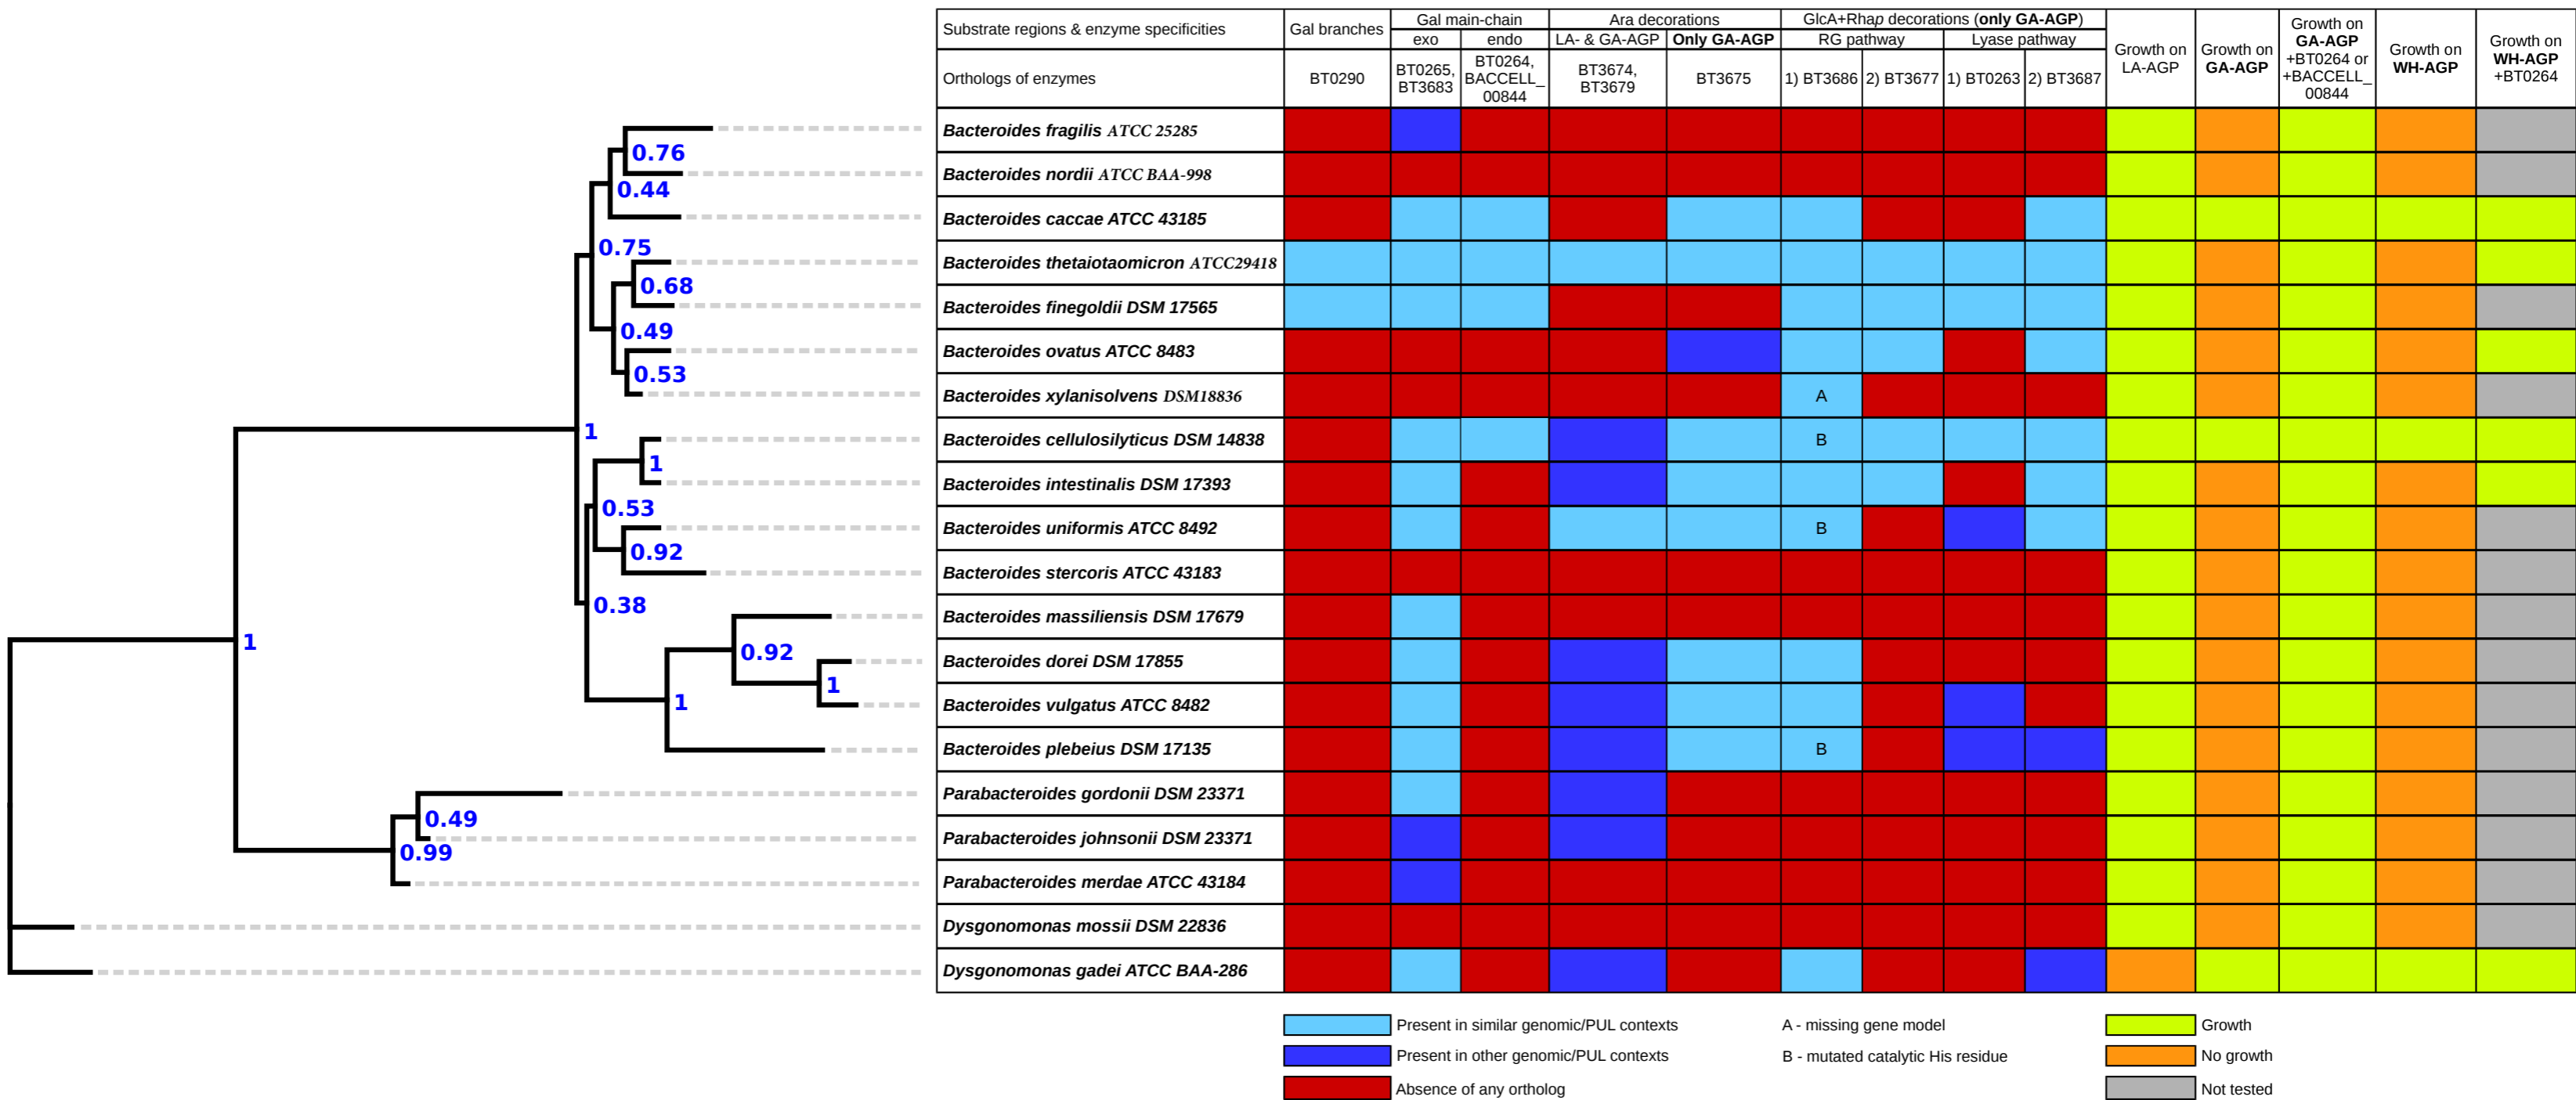

**Supplementary Table 4. Conservation of the key enzymes for AGP degradation in *B. thetaiotaomicron* and 19 Bacteroidetes species.**

A phylogenetic tree of the 20 species, reconstructed from the 16S-RNA, is displayed on the left with the bootstrap numbers shown in blue. The table on the right shows with colored cells, the existence and conserved microsynteny of the orthologs to *B. thetaiotaomicron* key enzymes involved in the deconstruction of AGP regions. Growth data of each species on three substrates are shown in the last columns.

Supplementary Table 5. Proteins identified on the surface of *B. thetaiotaomicron*::*bacell00844* using proteomics.

| SGBP   | Uniprot No. | CAZyme family and/or PUL                                 | Known or predicted function  | Signal peptide | Predicted or known cellular location |
|--------|-------------|----------------------------------------------------------|------------------------------|----------------|--------------------------------------|
| BT3079 | Q8A376      | None                                                     | Unknown                      | Type II        | Surface                              |
| BT2966 | Q8A3I8      | PUL44 <sup>L</sup> ; induced by host glycans             | SGBP                         | Type II        | Surface                              |
| BT1773 | Q8A6V3      | None                                                     | SusD-like                    | Type II        | Surface                              |
| BT4080 | Q8A0E1      | PUL74 <sup>L</sup> ; induced by host glycans             | Unknown                      | Type II        | Surface                              |
| BT3159 | Q8A2Z6      | PUL50 <sup>L</sup> ; induced by host glycans             | SGBP                         | Type II        | Surface                              |
| BT1896 | Q8A6I8      | None                                                     | Unknown                      | Type II        | Surface                              |
| BT1182 | Q8A8I5      | None                                                     | Unknown                      | Type II        | Surface                              |
| BT3792 | Q8A174      | GH76 in PUL68 <sup>L</sup> ; induced by $\alpha$ -mannan | Endo- $\alpha$ 1,6-mannanase | Type II        | Surface                              |
| BT4088 | Q8A0D3      | PUL74 <sup>L</sup> ; induced by host glycans             | SusC-like                    | Type II        | Surface                              |
| BT2623 | Q8A4H6      | GH76 in PUL36 <sup>L</sup> ; induced by $\alpha$ -mannan | Endo- $\alpha$ 1,6-mannanase | Type II        | Surface                              |
| BT3066 | Q8A388      | None                                                     | Unknown                      | Type II        | Surface                              |
| BT3523 | Q8A1Y5      | PUL60 <sup>L</sup> ; induced by host glycans             | Unknown                      | Type II        | Surface                              |
| BT3067 | Q8A387      | None                                                     | Unknown                      | Type II        | Surface                              |
| BT2125 | Q8A5W1      | None                                                     | Unknown                      | Type II        | Surface                              |
| BT3433 | Q8A273      | Unknown                                                  | Unknown                      | Type II        | Surface                              |
| BT2193 | Q8A5P5      | PUL28 <sup>L</sup> ; induced by host glycans             | Unknown                      | Type II        | Surface                              |

|              |        |                                                                  |                                            |         |                                     |
|--------------|--------|------------------------------------------------------------------|--------------------------------------------|---------|-------------------------------------|
| BT4245       | Q89ZX6 | PUL78 <sup>L</sup> ;<br>induced<br>by host<br>glycans            | SGBP                                       | Type II | Surface                             |
| BT3955       | Q8A0R6 | PUL71 <sup>L</sup> ;<br>induced<br>by host<br>glycans            | Unknown                                    | Type II | Surface                             |
| BT3960       | Q8A0R1 | PUL71 <sup>L</sup> ;<br>induced<br>by host<br>glycans            | SGBP                                       | Type II | Surface                             |
| BT4083       | Q8A0D8 | PUL74 <sup>L</sup> ;<br>induced<br>by host<br>glycans            | SGBP                                       | Type II | Surface                             |
| Baccell00844 | E2N999 | GH16                                                             | Endo- $\beta$ 1,3-<br>galactanase          | Type II | Surface                             |
| BT3438       | Q8A268 | None                                                             | Unknown                                    | Type II | Surface                             |
| BT2317       | Q8A5C2 | None                                                             | Unknown                                    | Type II | Surface                             |
| BT4984       | Q8A0D7 | PUL74 <sup>L</sup> ;<br>induced<br>by host<br>glycans            | SGBP                                       | Type II | Surface                             |
| BT1938       | Q8A6E6 | None                                                             | Unknown                                    | Type II | Predicted to<br>be a<br>lipoprotein |
| BT3961       | Q8A0R0 | PUL71 <sup>L</sup> ;<br>induced<br>by host<br>glycans            | SGBP                                       | Type II | Surface                             |
| BT0153       | Q8ABF7 | None                                                             | Unknown                                    | Type II | Surface                             |
| BT4171       | Q8A050 | PUL77 <sup>L</sup> ;<br>induced<br>by RGI                        | Unknown                                    | Type II | Surface                             |
| BT1044       | Q8A8X3 | GH18 in<br>PUL60 <sup>L</sup> ;<br>induced<br>by host<br>glycans | endo- $\beta$ -N-<br>acetylglucosaminidase | Type II | Surface                             |
| BT4167       | Q8A054 | PUL77 <sup>L</sup> ;<br>induced<br>by RGI                        | SGBP                                       | Type II | Surface                             |
| BT3793       | Q8A173 | PUL68 <sup>L</sup> ;<br>induced<br>by $\alpha$ -<br>mannan       | Unknown                                    | Type II | Surface                             |
| BT4170       | Q8A051 | PL9 in<br>PUL77 <sup>L</sup> ;<br>induced<br>by RGI              | RGI lyase                                  | Type II | Bacterial<br>surface                |
| BT3859       | Q8A112 | PUL69 <sup>L</sup> ;<br>induced                                  | Unknown                                    | Type II | Surface                             |

|        |        |                                                  |                               |         |         |
|--------|--------|--------------------------------------------------|-------------------------------|---------|---------|
|        |        | by $\alpha$ -mannan                              |                               |         |         |
| BT4471 | Q89ZA6 | PUL83                                            | SusD-like                     | Type II | Surface |
| BT4668 | Q89YR3 | GH53 in PUL86 <sup>L</sup> ; induced by galactan | Endo- $\beta$ 1,3-galactanase | Type II | Surface |
| BT0142 | Q8ABG8 | None                                             | Unknown                       | Type II | Surface |
| BT3988 | Q8A0N3 | PUL72 <sup>L</sup>                               | Unknown                       | Type II | Surface |
| BT3436 | Q8A270 | None                                             | Unknown                       | Type II | Surface |
| BT4166 | Q8A055 | PUL77 <sup>L</sup> ; induced by RGI              | Unknown                       | Type II | Surface |
| BT3741 | Q8A1C5 | None                                             | Unknown                       | Type II | Surface |
| BT3476 | Q8A230 | PUL59 <sup>L</sup>                               | SGBP                          | Type II | Surface |
| BT3026 | Q8A3C8 | PUL46 <sup>L</sup>                               | Unknown                       | Type II | Surface |
| BT4605 | Q89YX5 | None                                             | Unknown                       | Type II | Surface |
| BT1038 | Q8A8X9 | PUL14 <sup>L</sup>                               | SGBP                          | Type II | Surface |

SGBP; surface glycan binding proteins. <sup>L</sup>; PUL identified from the literature in PULDB (<http://www.cazy.org/PULDB/>). Function is predicted (**red**) based on the position of the gene adjacent to *susC-susD* pairs, in the case of putative SGBPs, or the CAZy family in which the protein is located. Cellular location is predicted (**red**) based on the presence of a type II signal peptide that anchors the protein onto the outer membrane. Proteins displaying substantial sequence identity to SusD or SusC proteins are coloured **blue**. These proteins are highly likely to be located on the outer membrane exposed on the surface. Proteins coloured **green** have been shown to display the function identified and/or experimentally demonstrated to be presented on the bacterial surface.



**Supplementary Table 6a. Data statistics and refinement details.**

|                                          | <b>BT0265</b>              | <b>BT0265Hexa</b>              | <b>BT3683Gal</b>           | <b>BT3683GalIM</b>         |
|------------------------------------------|----------------------------|--------------------------------|----------------------------|----------------------------|
| <b>Data collection</b>                   |                            |                                |                            |                            |
| <b>Date</b>                              | 16/10/15                   | 12/12/16                       | 13/02/16                   | 08/05/17                   |
| <b>Source</b>                            | IO4-1                      | IO4-1                          | IO4-1                      | IO4-1                      |
| <b>Wavelength</b>                        | 0.98                       | 0.93                           | 0.97                       | 0.97                       |
| <b>Space Group</b>                       | P1                         | P2 <sub>1</sub> 2 <sub>1</sub> | H3 <sub>2</sub>            | H3                         |
| <b>Cell dimensions</b>                   |                            |                                |                            |                            |
| <b>a, b, c (Å)</b>                       | 73.32, 73.33,<br>116.46    | 106.00, 119.70,<br>182.18      | 136.38, 136.38,<br>53.44   | 135.40, 135.40,<br>51.69   |
| <b>α,β,γ, (°)</b>                        | 91.04, 72.59,<br>80.07     | 90, 90, 90                     | 90, 90, 120                | 90, 90, 120                |
| <b>No. of measured reflections</b>       | 114998 (9158)              | 864376 (43789)                 | 196254 (14984)             | 253965 (13080)             |
| <b>No. of independent reflections</b>    | 58162 (4564)               | 117960(5795)                   | 36549 (2705)               | 45732 (2309)               |
| <b>Resolution (Å)</b>                    | 46.53-2.75 (2.83-<br>2.75) | 100.4-2.2 (2.24-<br>2.20)      | 68.19-1.76 (1.81-<br>1.76) | 25.59-1.61 (1.64-<br>1.61) |
| <b>CC<sub>1/2</sub></b>                  | 0.978 (0.650)              | 0.998 (0.667)                  | 0.997 (0.435)              | 0.997 (0.475)              |
| <b>Mean I/σ</b>                          | 4.5 (1.6)                  | 13.3 (3.1)                     | 11.5 (1.6)                 | 10.8 (1.3)                 |
| <b>Completeness</b>                      | 98.4 (98.0)                | 100 (100)                      | 99.5 (99.9)                | 99.9 (100)                 |
| <b>Redundancy</b>                        | 2.0 (2.0)                  | 13.3 (3.3)                     | 5.4 (5.5)                  | 5.6 (5.7)                  |
| <b>Refinement</b>                        |                            |                                |                            |                            |
| <b>R<sub>work</sub>/R<sub>free</sub></b> | 0.22/0.25                  | 0.21/0.27                      | 0.17/0.21                  | 0.13/0.19                  |
| <b>No. atoms</b>                         |                            |                                |                            |                            |
| <b>Protein</b>                           | 14732                      | 14919                          | 2771                       | 2822                       |
| <b>Ligand/Ions</b>                       | -/-                        | 232/-                          | 24/1                       | 14                         |
| <b>Water</b>                             | -                          | 538                            | 268                        | 410                        |
| <b>B-factors</b>                         |                            |                                |                            |                            |
| <b>Protein</b>                           | 30.97                      | 38.3                           | 30.5                       | 19.9                       |
| <b>Ligand/Ions</b>                       | -/-                        | 57.8                           | 28.7/51.7                  | 22.7                       |
| <b>Water</b>                             | -/-                        | 38.3                           | 38.7                       | 31.6                       |
| <b>r.m.s deviations</b>                  |                            |                                |                            |                            |
| <b>Bond lengths</b>                      | 0.011                      | 0.017                          | 0.013                      | 0.014                      |
| <b>Bond angles</b>                       | 1.50                       | 1.77                           | 1.51                       | 1.53                       |
| <b>PDB code</b>                          | 6EUJ                       | 6EUF                           | 6EUI                       | 6EUG                       |

\*(Values in parenthesis are for the highest resolution shell).

#5% of the randomly selected reflections excluded from refinement.

+Calculated using MOLPROBITY.

**Supplementary Table 6b. Data statistics and refinement details.**

|                                          | <b>BT3683GalDNJ</b>        | <b>BT0290Gal</b>          | <b>BT3674</b>              |
|------------------------------------------|----------------------------|---------------------------|----------------------------|
| <b>Data collection</b>                   |                            |                           |                            |
| <b>Date</b>                              | 13/02/16                   | 26/01/14                  | 02/02/16                   |
| <b>Source</b>                            | IO4-1                      | IO2                       | IO2                        |
| <b>Wavelength</b>                        | 0.97                       | 0.98                      | 0.98                       |
| <b>Space Group</b>                       | P1                         | P22121                    | P6 <sub>5</sub>            |
| <b>Cell dimensions</b>                   |                            |                           |                            |
| <b>a, b, c (Å)</b>                       | 52.18, 77.20, 78.69        | 62.04, 101.16,<br>143.21  | 136.81, 136.81,<br>135.56  |
| <b>α,β,γ, (°)</b>                        | 114.00, 101.78,<br>100.78  | 90,90,90                  | 90, 90, 120                |
| <b>No. of measured reflections</b>       | 134165 (8686)              | 640375 (28390)            | 886170 (65903)             |
| <b>No. of independent reflections</b>    | 67881 (4470)               | 92027 (4185)              | 77030 (5696)               |
| <b>Resolution (Å)</b>                    | 67.23-2.00 (2.05-<br>2.00) | 46.61-1.75<br>(1.77-1.75) | 68.40-2.16 (2.22-<br>2.16) |
| <b>CC<sub>1/2</sub></b>                  | 0.947(0.685)               | -                         | 0.998 (0.578)              |
| <b>Mean I/σ</b>                          | 7.2 (2.8)                  | 13.8 (2.5)                | 12.9 (1.4)                 |
| <b>Completeness</b>                      | 95.9 (93.9)                | 99.3 (92.0)               | 100 (99.9)                 |
| <b>Redundancy</b>                        | 2.0 (1.9)                  | 7.0 (6.8)                 | 11.5 (11.6)                |
| <b>Refinement</b>                        |                            |                           |                            |
| <b>R<sub>work</sub>/R<sub>free</sub></b> | 0.18/0.23                  | 0.16/0.18                 | 0.17/0.22                  |
| <b>No. atoms</b>                         |                            |                           |                            |
| <b>Protein</b>                           | 8229                       | 6153                      | 4910                       |
| <b>Ligand/Ions</b>                       | 33/3                       | 13/-                      | -/2                        |
| <b>Water</b>                             | 618                        | 625                       | 727                        |
| <b>B-factors</b>                         |                            |                           |                            |
| <b>Protein</b>                           | 24.13                      | 17.6                      | 35.8                       |
| <b>Ligand/Ions</b>                       | 32.48/32.48                | 11.4/-                    | -/30.06                    |
| <b>Water</b>                             | 30.83                      | 26.7                      | 40.9                       |
| <b>r.m.s deviations</b>                  |                            |                           |                            |
| <b>Bond lengths</b>                      | 0.013                      | 0.010                     | 0.018                      |
| <b>Bond angles</b>                       | 1.55                       | 1.43                      | 1.80                       |
| <b>PDB code</b>                          | 6EUH                       | 6EON                      | 6EX6                       |

\*(Values in parenthesis are for the highest resolution shell).

#5% of the randomly selected reflections excluded from refinement.

\*Calculated using MOLPROBITY.

**Supplementary Table 7. <sup>1</sup>H and <sup>13</sup>C NMR assignments of the AGP tetra- and heptasaccharides at 25 °C in D<sub>2</sub>O.**

|                        | H1    | H2    | H3    | H4    | H5           | H6           | C1     | C2    | C3    | C4    | C5    | C6     |
|------------------------|-------|-------|-------|-------|--------------|--------------|--------|-------|-------|-------|-------|--------|
| Tetrasaccharide        |       |       |       |       |              |              |        |       |       |       |       |        |
| β-D-Galp <sub>1</sub>  | 4.597 | 3.492 | 3.651 | 3.956 | 3.902        | 3.896, 4.047 | 97.21  | 72.60 | 73.45 | 69.61 | 74.56 | 70.28  |
| α-D-Galp <sub>1</sub>  | 5.265 | 3.800 | 3.869 | 4.018 | 4.280        | 3.849, 4.039 | 93.16  | 69.09 | 69.76 | 70.15 | 70.12 | 70.39  |
| β-D-Galp <sub>2</sub>  | 4.433 | 3.529 | 3.651 | 3.934 | 3.894        | 3.897, 4.016 | 103.94 | 71.53 | 73.32 | 69.41 | 74.56 | 70.34  |
| β-D-GlcpA <sub>3</sub> | 4.558 | 3.369 | 3.605 | 3.639 | 3.955        | -            | 103.52 | 73.97 | 74.91 | 79.65 | 75.23 | 174.11 |
| α-L-Rhap <sub>4</sub>  | 4.742 | 3.926 | 3.746 | 3.432 | 4.013        | 1.245        | 101.74 | 71.04 | 70.87 | 72.65 | 69.89 | 17.24  |
| Heptasaccharide        |       |       |       |       |              |              |        |       |       |       |       |        |
| β-D-Galp <sub>1</sub>  | 4.599 | 3.494 | 3.657 | 3.963 | 3.897        | 3.895, 4.066 | 97.22  | 72.60 | 73.41 | 69.60 | 74.65 | 70.36  |
| α-D-Galp <sub>1</sub>  | 5.272 | 3.803 | 3.872 | 4.019 | 4.279        | 4.052, 3.856 | 93.18  | 69.09 | 69.99 | 70.13 | 70.18 | 70.41  |
| β-D-Galp <sub>2</sub>  | 4.515 | 3.723 | 3.875 | 4.180 | 3.985        | 3.883, 4.001 | 103.74 | 71.39 | 80.43 | 74.47 | 74.41 | 70.66  |
| β-D-GlcpA <sub>3</sub> | 4.496 | 3.360 | 3.564 | 3.566 | 3.725        | -            | 103.72 | 74.08 | 75.05 | 79.94 | 77.11 | 176.07 |
| α-L-Rhap <sub>4</sub>  | 4.728 | 3.927 | 3.758 | 3.422 | 4.018        | 1.244        | 101.54 | 71.08 | 70.84 | 72.71 | 69.72 | 17.28  |
| α-L-Araf <sub>5</sub>  | 5.386 | 4.159 | 3.912 | 4.068 | 3.685, 3.799 | -            | 108.92 | 82.22 | 77.60 | 84.93 | 62.01 | -      |
| α-L-Araf <sub>6</sub>  | 5.270 | 4.391 | 3.939 | 4.281 | 3.859, 3.742 | -            | 110.33 | 80.87 | 85.68 | 83.73 | 61.97 | -      |
| α-D-Galp <sub>7</sub>  | 5.026 | 3.802 | 3.865 | 3.982 | 4.066        | 3.750, 3.750 | 100.93 | 69.12 | 69.94 | 70.05 | 72.17 | 62.00  |

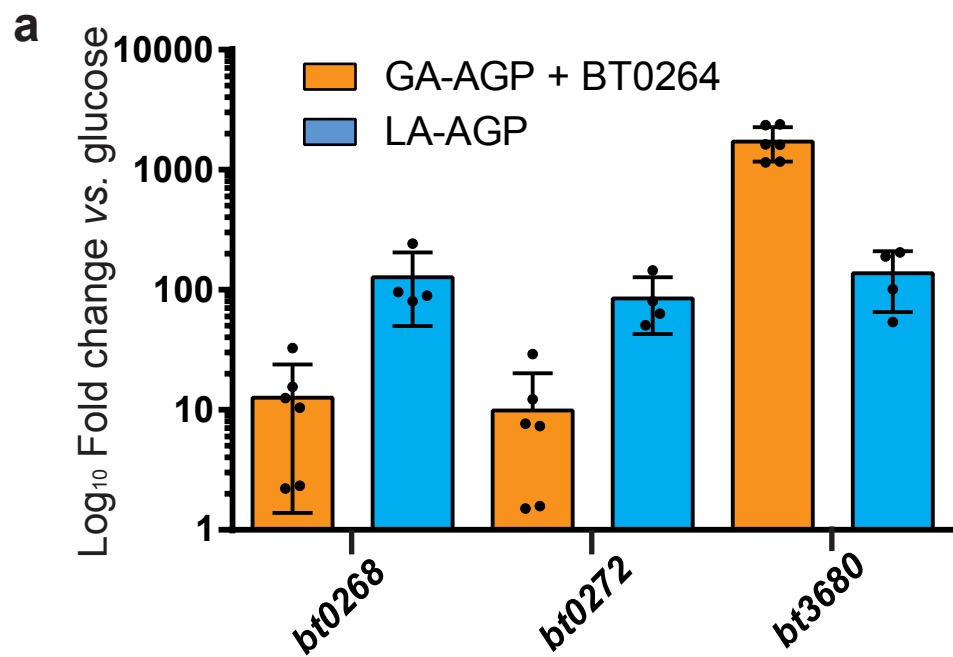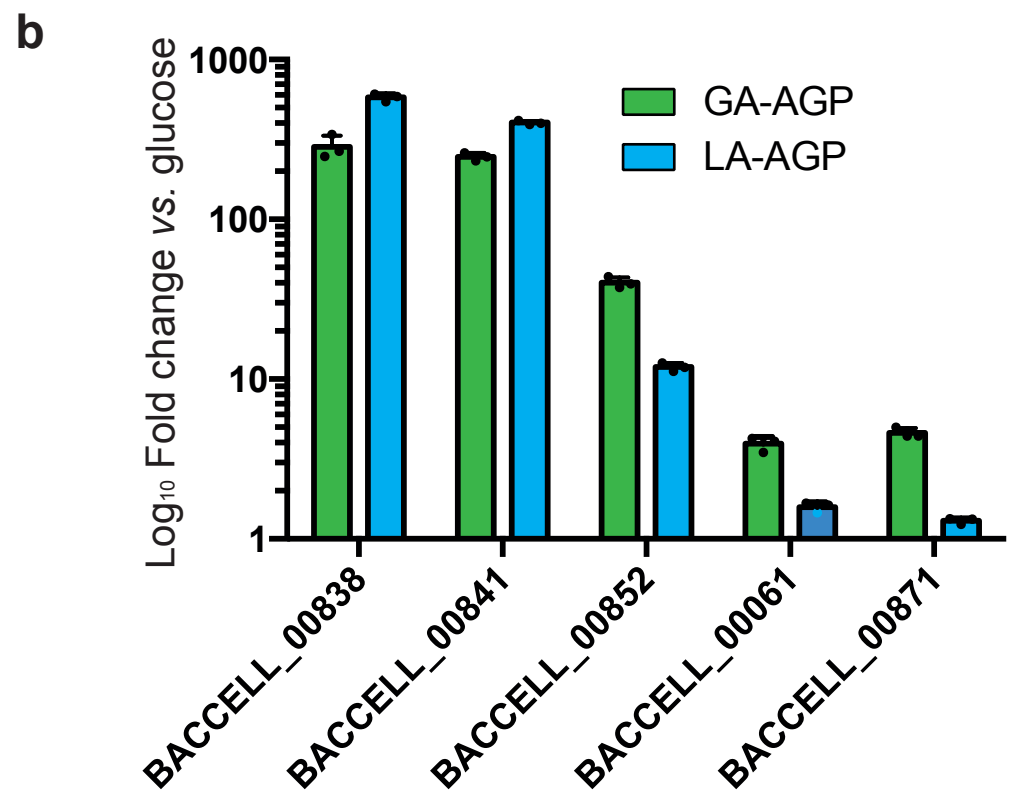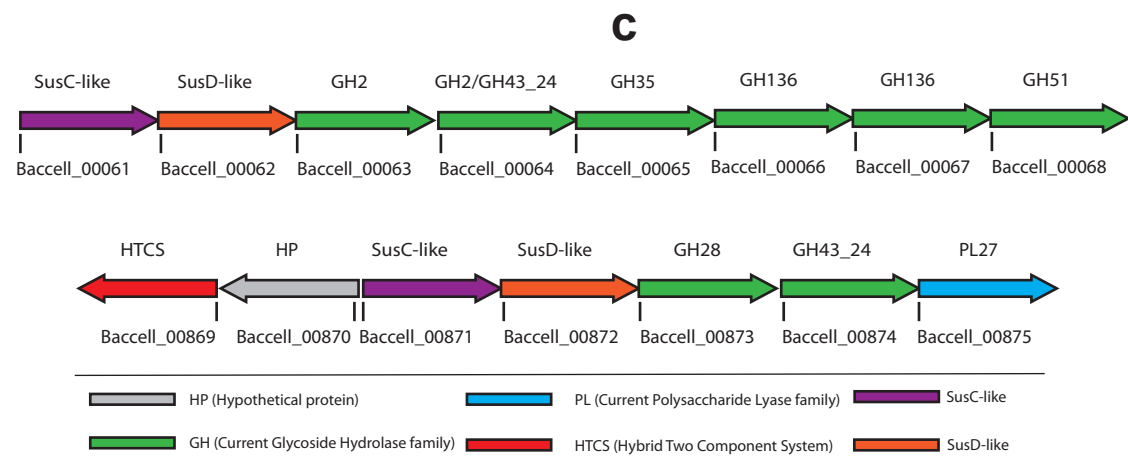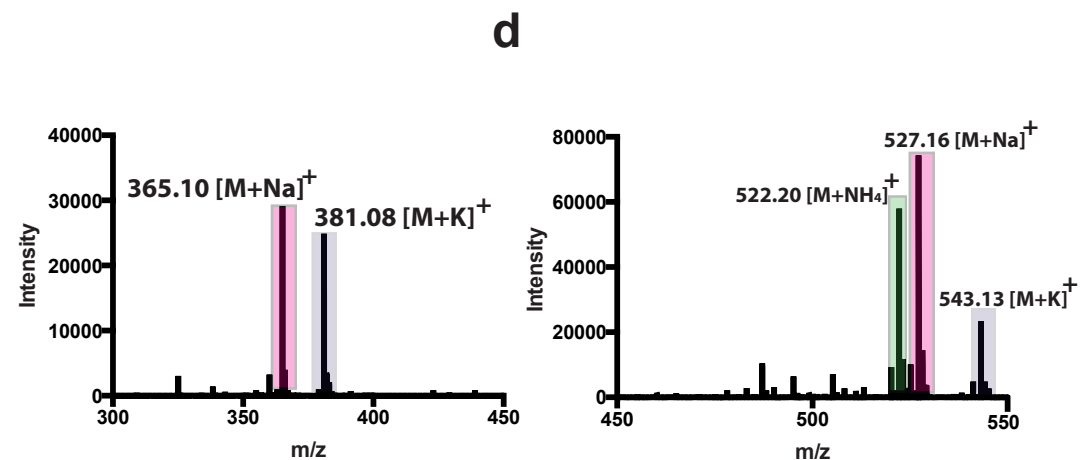

**Supplementary Figure 1 RT-PCR of PULs activated by AGP and mass spectrometry of galactosidase reaction products.** In **a** RT-PCR of the *SusC* genes in *B. thetaiotaomicron* PULAGPS and PULAGPL were used to determine the upregulation of the two loci in the bacterium cultured on LA-AGP and GA-AGP (biological replicates  $n = 6$ ). In **b** RT-PCR of *susC* genes in loci containing GH16 and/or GH43\_24 genes in *B. cellulosilyticus* cultured on LA-AGP or GA-AGP (biological replicates  $n = 3$ ). In **a** and **b** error bars are standard errors of the mean. The *SusC* genes *baccell00838*, *baccell00841* and *baccell00852*, which were substantially upregulated by both AGPs, are in a single large PUL whose content is shown in Supplementary Fig. 15. The structure of the PULs containing the other two *susC* genes, *baccell00061* and *baccell00871*, which were only marginally upregulated, are shown in **c**. In **d** [example of independent replicates ( $n = 2$ )] the two major products generated by  $\text{exo-}\beta$ 1,3-galactosidase BT0265 acting on LA-AGP (see Fig. 2) were subjected to LC-MS (see Methods). The mass of the oligosaccharides (relevant peaks shaded according to the adduct ion) were consistent with  $\beta$ 1,6-galactobiose and  $\beta$ 1,6-galactotriose.

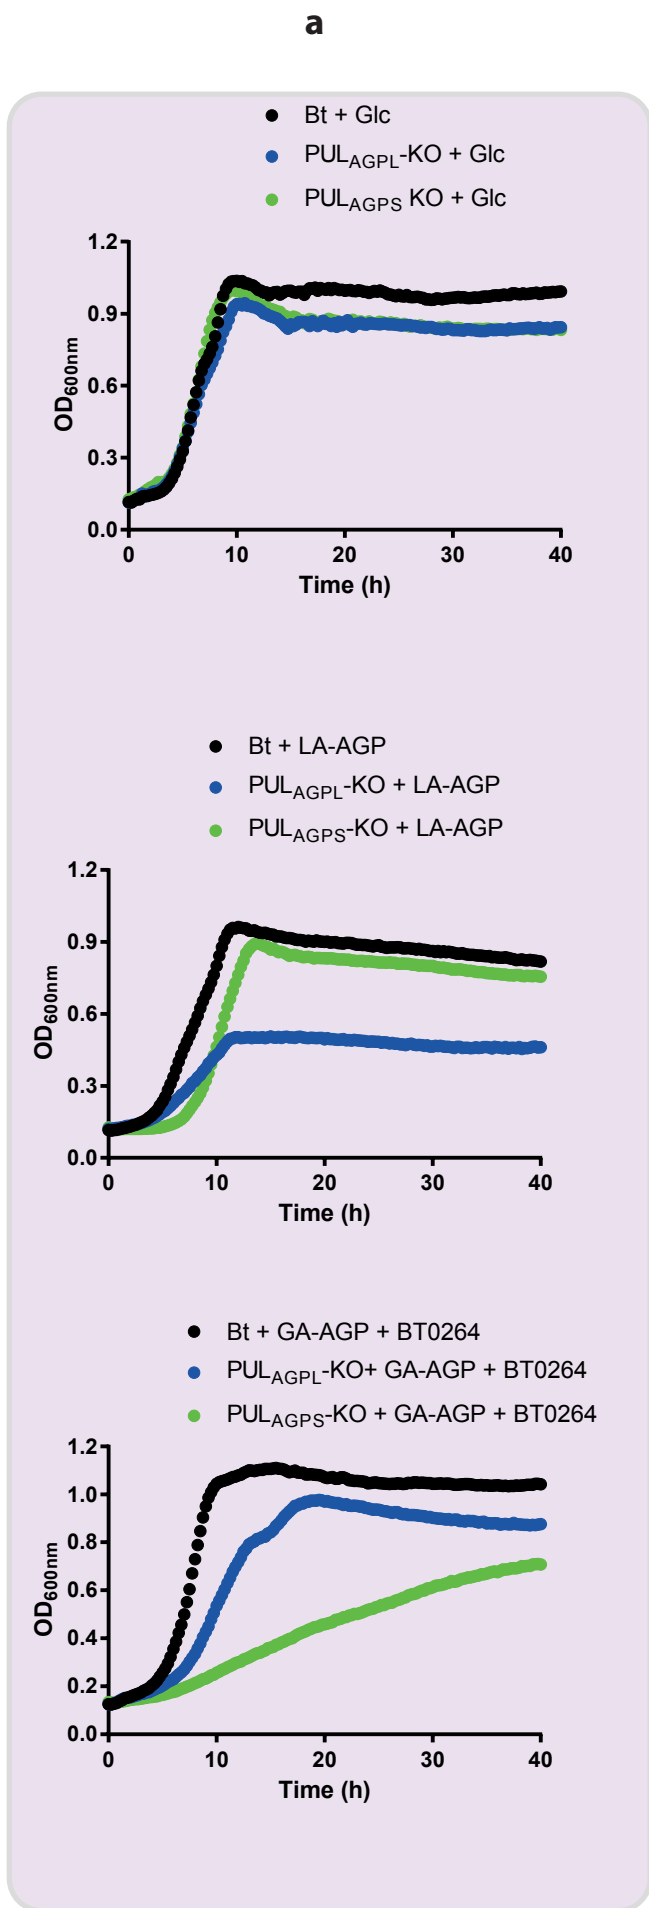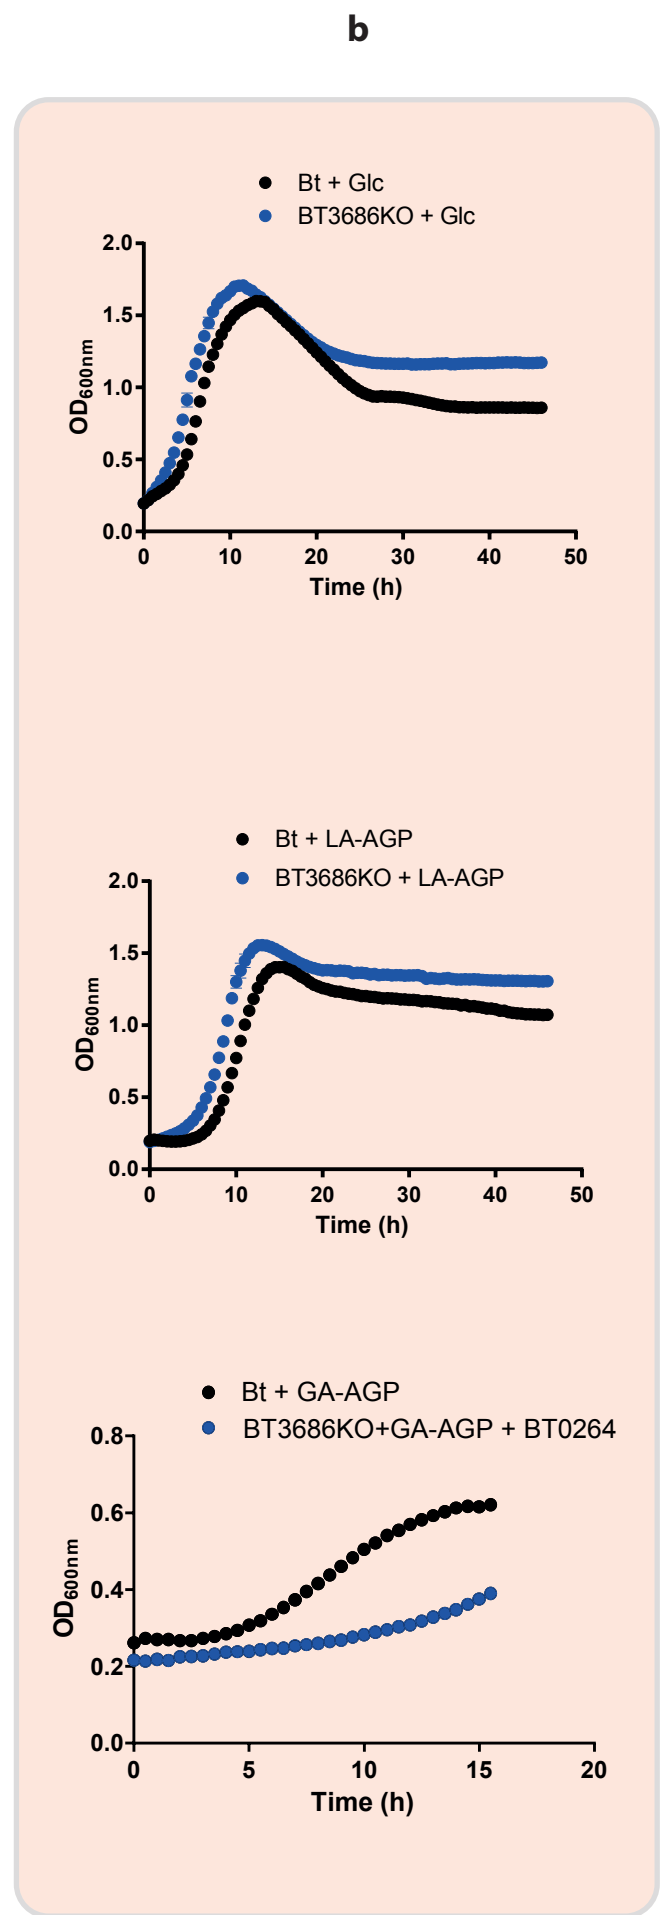

**Supplementary Figure 2. Growth profile of wild type and mutants of *B. thetaiotaomicron*.** Wild type (WT) and mutants were cultured on minimal medium containing the appropriate AGP at 10 mg/ml and growth was monitored at 600 nm every 15 min using an automated spectrophotometer (independent replicates  $n = 3$ , error bars s.e.m.). **a** shows the growth profiles of mutants in which the two AGP PULs have been deleted (KO), and **b** displays the growth curves of the mutant in which the gene encoding the rhamnosidase BT3686 had been deleted (KO).

**a**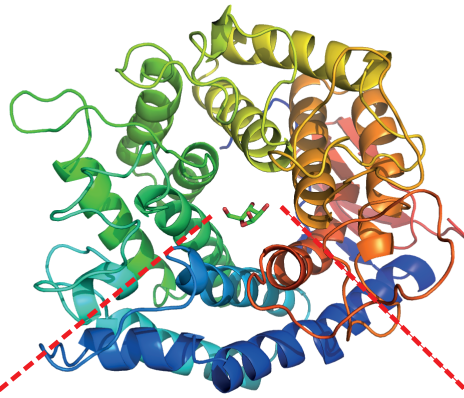**b**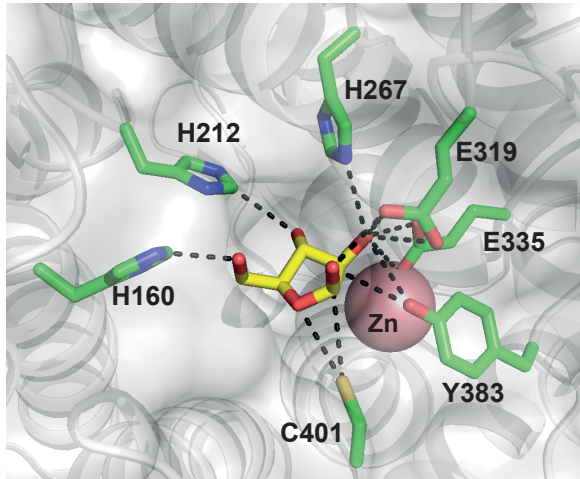**c**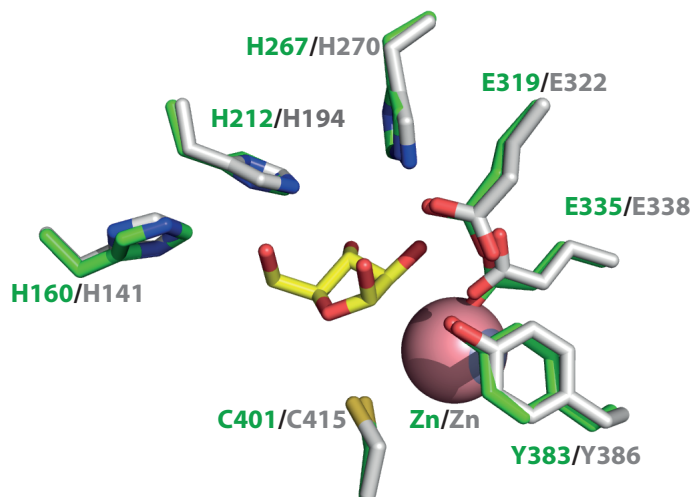

**Supplementary Figure 3. Crystal structure of BT3674 (PDN 6EX6).** **a**, schematic of BT3674 colour ramped from the N-terminus (blue) to the C-terminus (red). **b**, the active site amino acids of BT3674 (carbons coloured green) that interact with arabinofuranose (carbons in yellow) are shown with polar contacts depicted by broken black lines. **c**, an overlay of the active site residues of BT3674 (amino acids coloured green and arabinofuranose yellow) with the *Bifidobacterium longum*  $\beta$ -L-arabinofuranosidase HypBA1 (PDB code 3WKX; amino acids shown in light grey).

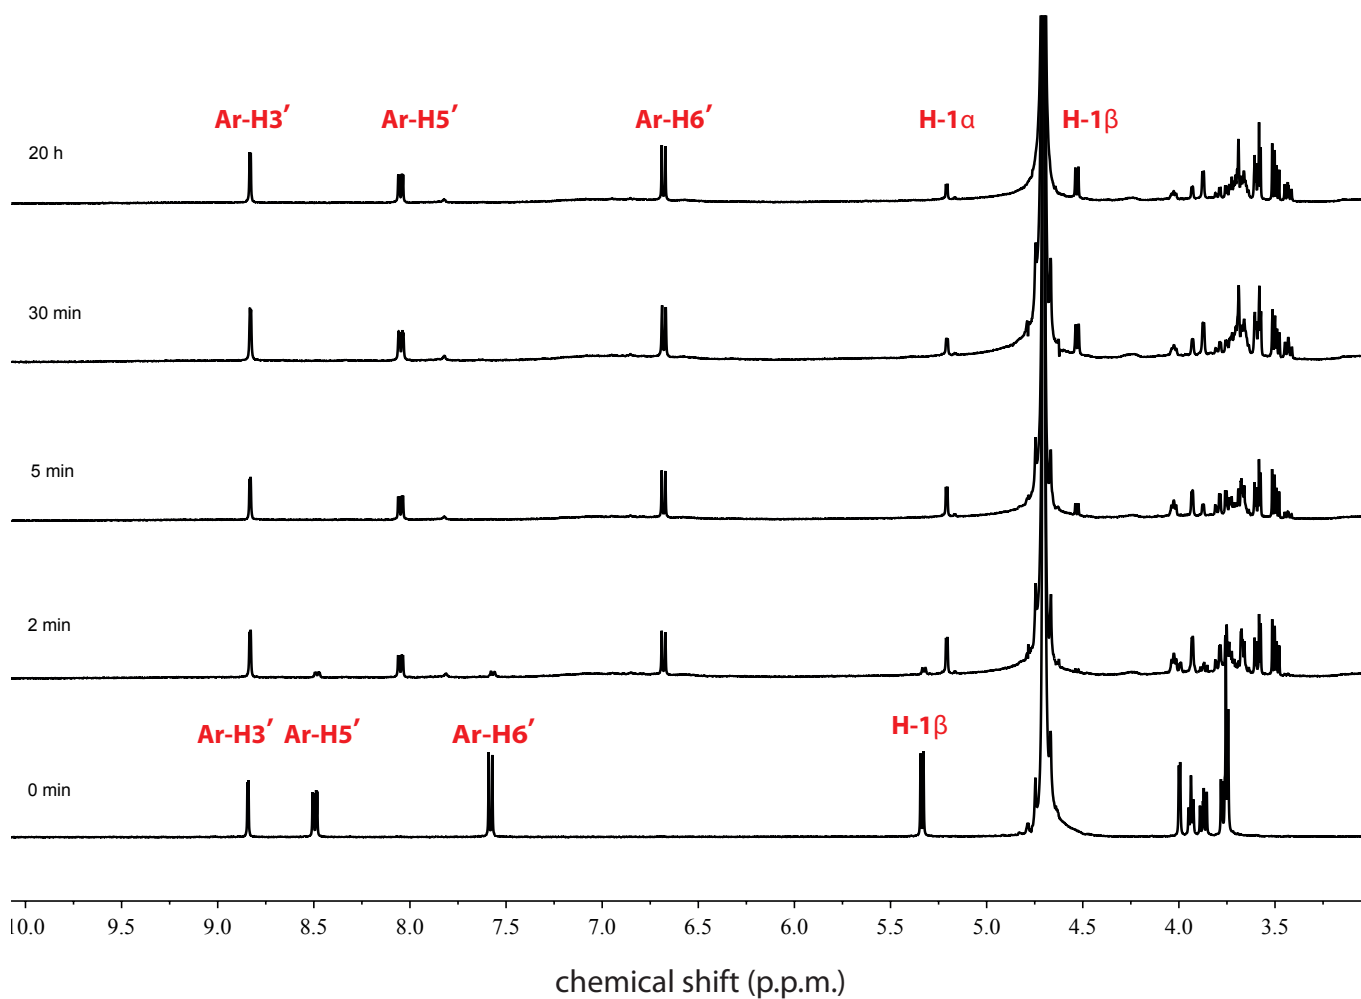

**Supplementary Figure 4. <sup>1</sup>H-NMR analysis of the activity of BT3685.** Enzyme at 20 μM was incubated with 5 mM 2,4-dinitrophenyl β-D-galactopyranoside in 20 mM sodium phosphate buffer pH 7.0 implemented with 150 mM NaCl standard conditions in a solvent of D<sub>2</sub>O. Spectra were recorded at the indicated times. The data presented are examples of biological replicates (n = 2). Ar means Aromatic ring of 2,4-dinitrophenyl β-D-galactopyranoside.

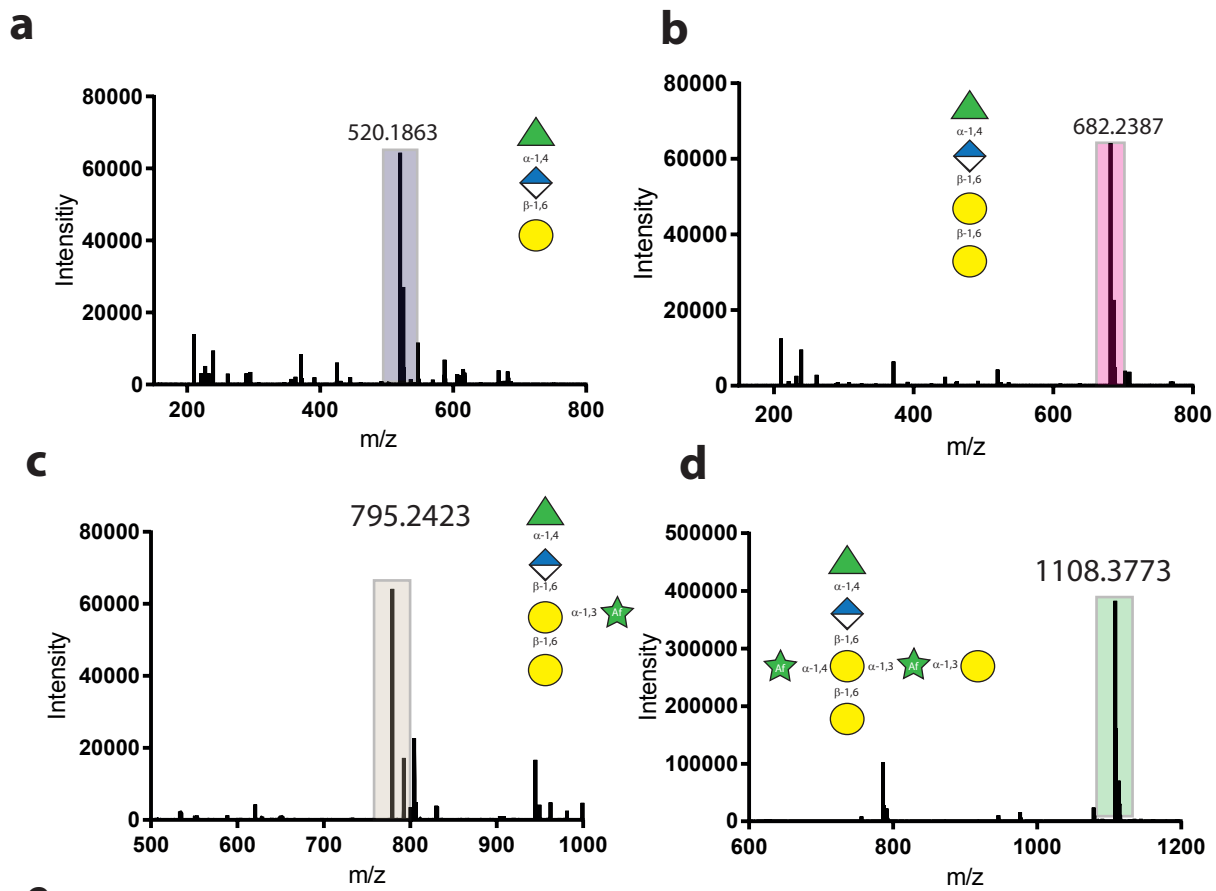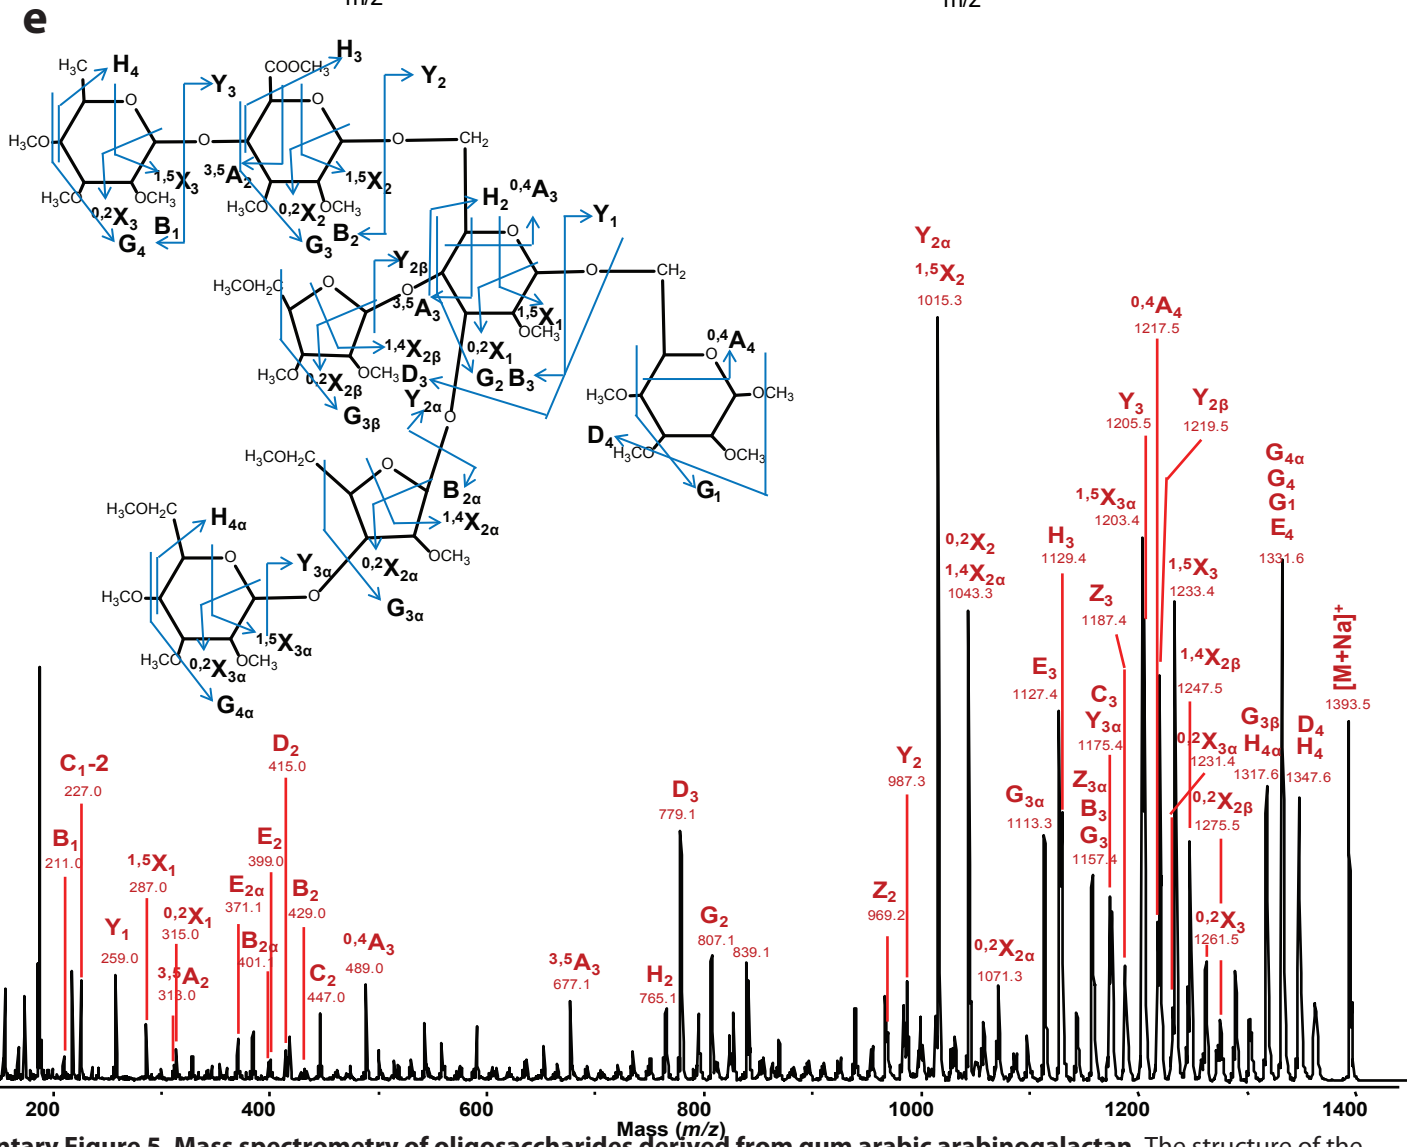

**Supplementary Figure 5. Mass spectrometry of oligosaccharides derived from gum arabic arabinogalactan.** The structure of the oligosaccharides and their size determined by mass spectrometry are shown in **a**, **b**, **c**, and **d**. Relevant peaks were shaded according to the adduct ion; grey H<sup>+</sup>, mouve, NH<sub>4</sub><sup>+</sup>, pink Na<sup>+</sup>, green K<sup>+</sup>. The tandem mass spectrometry (MS/MS) spectrum of the per-methylated heptasaccharide is shown in **e**, with inset a schematic structure of the oligosaccharide. The blue arrows in the inset illustrate the generation of the fragment ions seen in the MS/MS. 2D NMR in the case of the tetrasaccharide and the heptasaccharide was also used to determine the structure of these oligosaccharides (see **Supplementary Fig. 6**). **a**, **b**, **c** and **d** are examples of independent replicates (n = 2), while collectively, the data in **e** are examples of replicates n = 3.



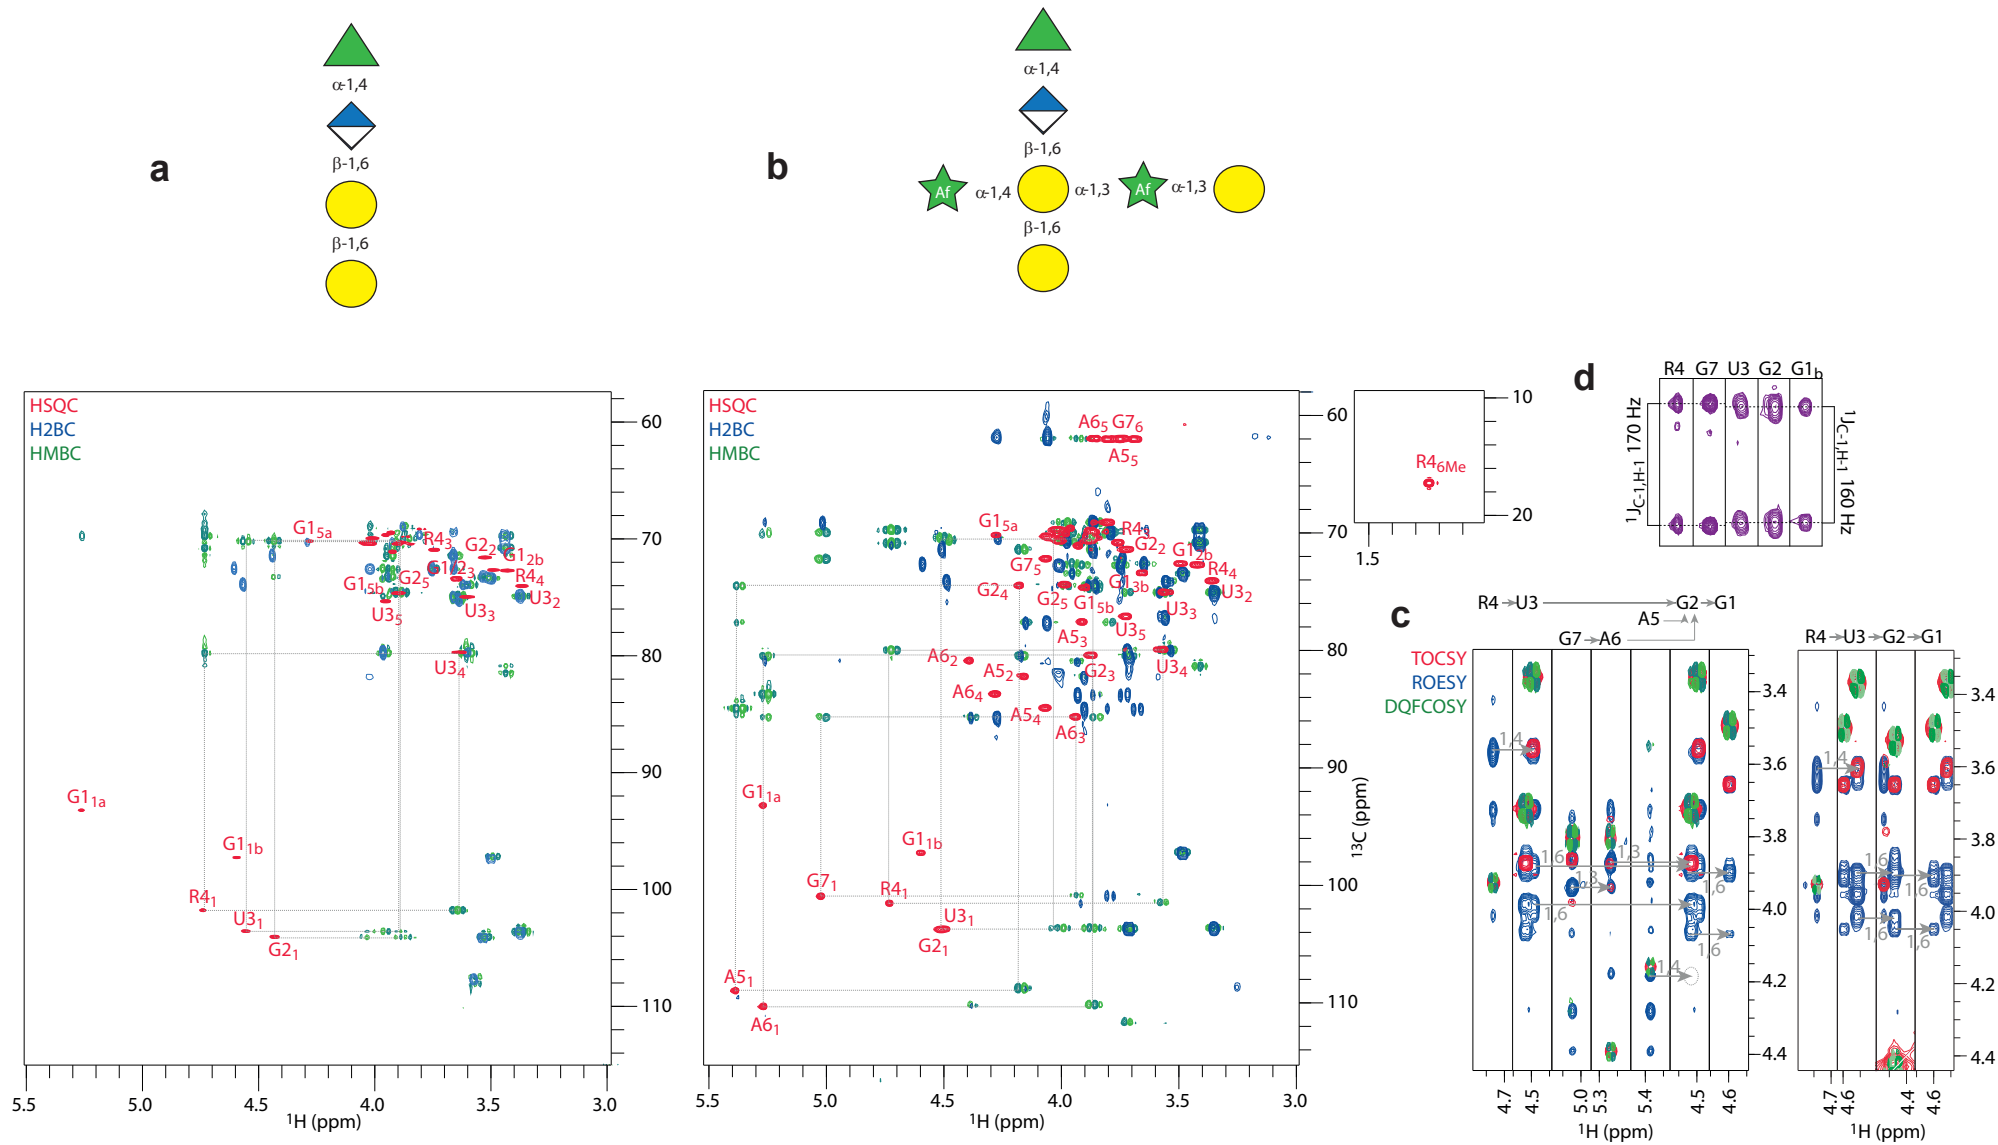

**Supplementary Figure 6. NMR analysis of the tetra- and heptasaccharides.** Derived structures of (a) the tetrasaccharide and (b) the heptasaccharide, shown above 2D  $^{13}\text{C}$  HSQC (Heteronuclear Single Quantum Coherence), H2BC and HMBC spectra (red, blue and green, respectively) displaying the assignment of all well-resolved H,  $^{13}\text{C}$  HSQC peaks. (Assignments in the more congested region are not shown but are listed in Supplementary Table 7). Glycosidic bonds were evident from inter-residue cross-peaks in the HMBC (grey dotted lines) and downfield shifts of the  $^{13}\text{C}$  resonance positions of the linked carbon. The methyl group in the 6-position of  $\alpha$ -L-Rhap is shown in a separate panel (b, top right). (c) H-1 strip plots from 2D H-H TOCSY [Total Correlation Spectroscopy (red)], ROESY [Rotating-frame Overhauser Effect Spectroscopy (blue)] and DQFCOSY [Double Quantum Filtered Correlation Spectroscopy (green)] spectra showing the NOE connectivity in the hepta- and tetra-saccharides arising from the glycosidic linkages. (d) Strip plots of the C-1,H-1 peaks from an F1-coupled C HSQC showing the  $\alpha$ - and  $\beta$ -anomeric linkages of R4 and G7 (alpha,  $^1\text{J}_{\text{C-1,H-1}} \sim 170$  Hz) and G1 $\beta$  (beta,  $^1\text{J}_{\text{C-1,H-1}} \sim 160$  Hz) in the heptasaccharide and U3 and G2 (beta,  $^1\text{J}_{\text{C-1,H-1}} \sim 160$  Hz) in the tetrasaccharide (the U3 and G2 signals were not perfectly resolved in the heptasaccharide). The data are, collectively, examples of replicates  $n = 3$ .

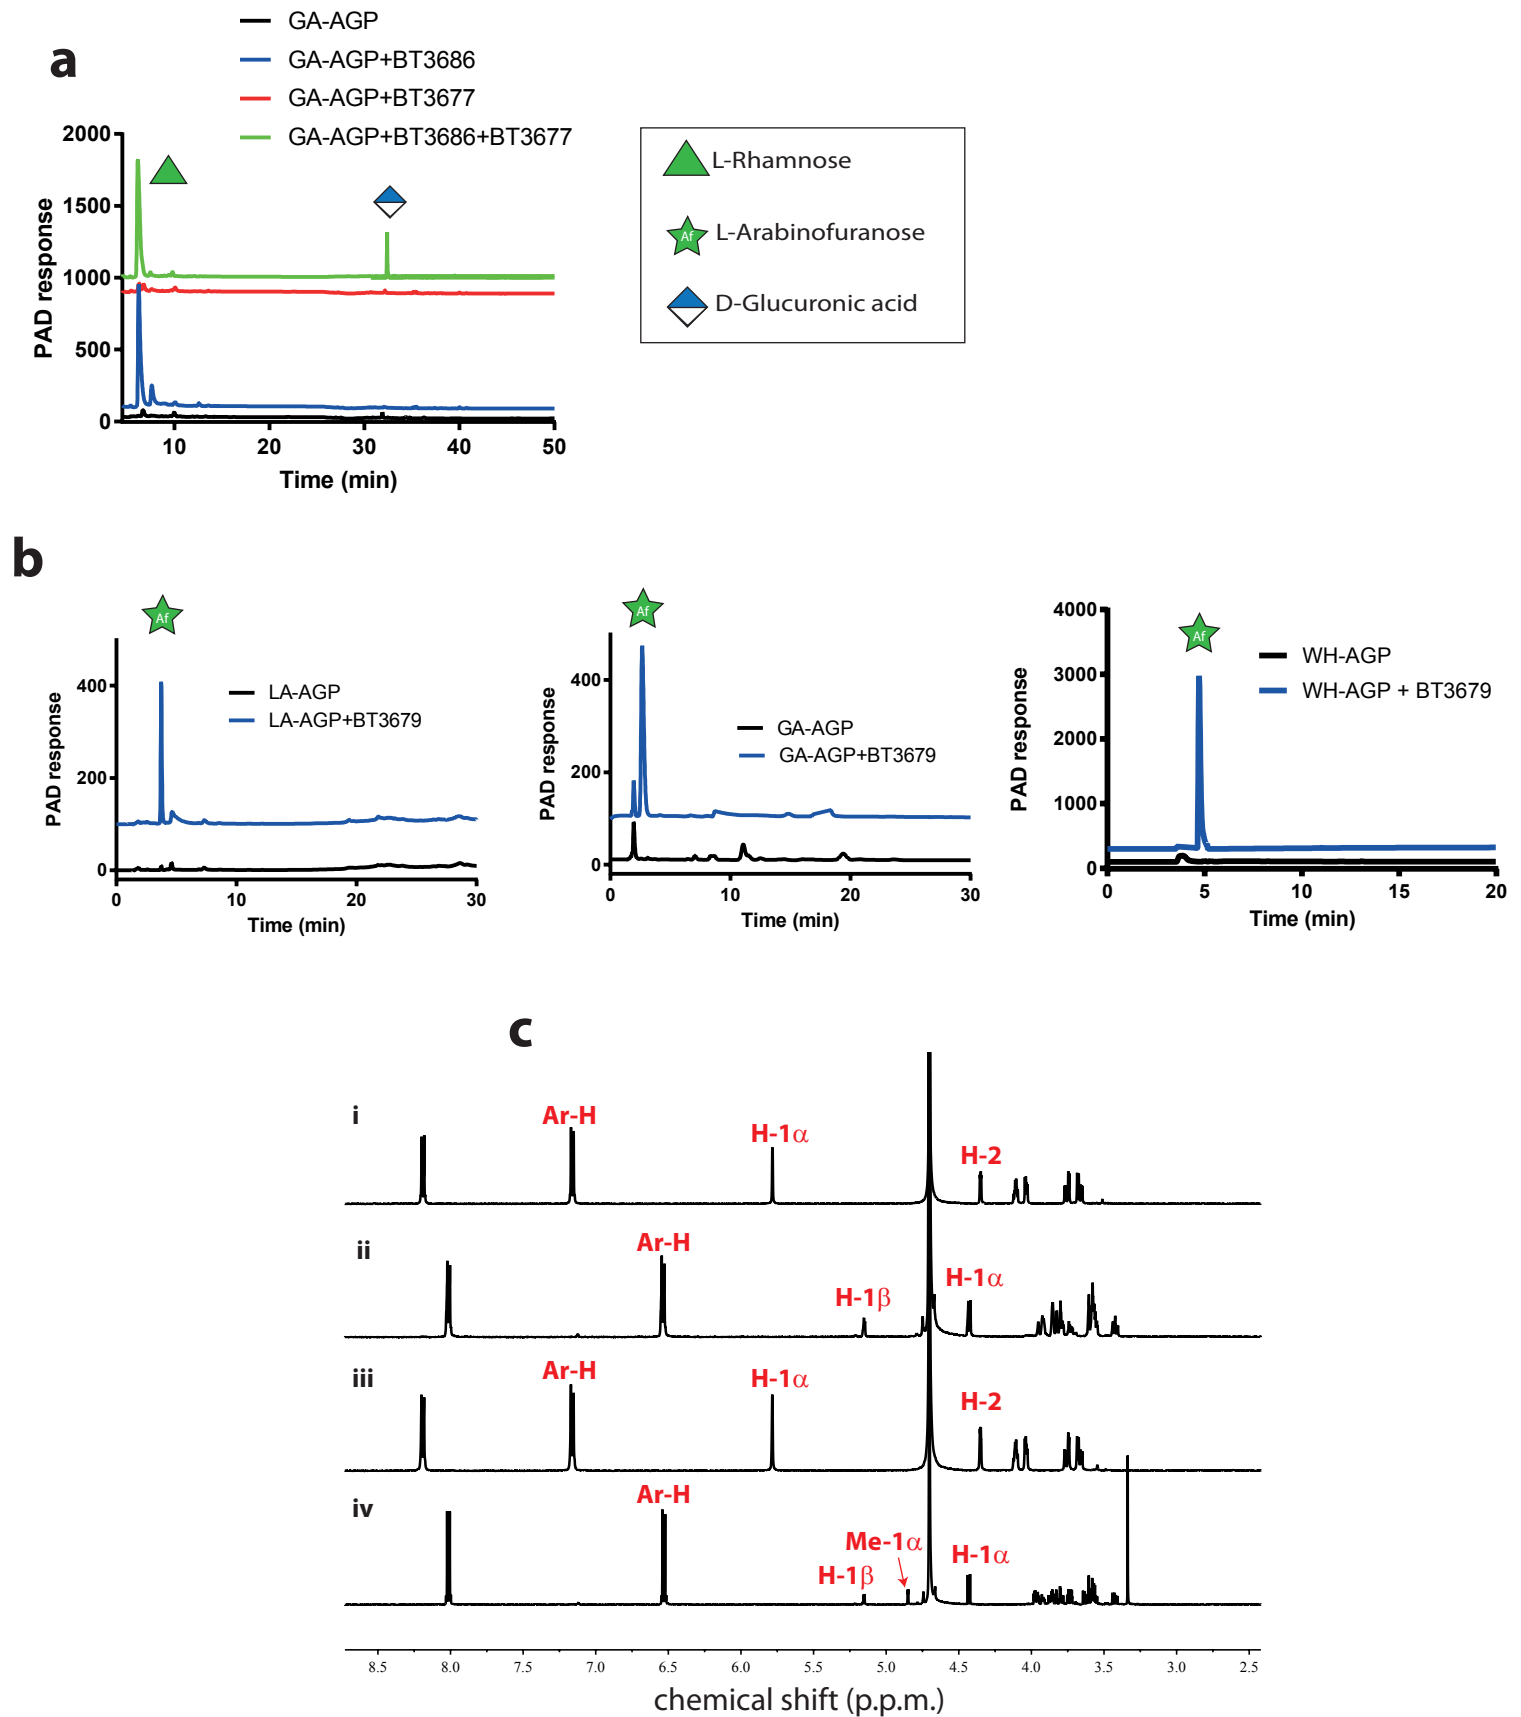

**Supplementary Figure 7. Biochemical characterization of two enzymes that are the founding members of previously unknown GH families.** **a**, activity of BT3677. The panel shows the release of GlcA from GA-AGP using HPAEC. The conditions were 20 mM sodium phosphate buffer, pH 7.0, [GA]<sub>0</sub> = 10 mg/ml, [BT3686]<sub>0</sub> = 1  $\mu$ M and [BT3677]<sub>0</sub> = 1  $\mu$ M. **b**, shows HPAEC analysis of BT3679 incubated with LA-AGP, or GA-AGP and WH-AGP. The release of arabinose was visible. **c**, <sup>1</sup>H-NMR analysis of the activity of the enzyme. BT3679 was incubated with 4-nitrophenyl  $\alpha$ -L-arabinofuranoside (4NPA) in the absence (ii) and presence (iv) of 2.5 M methanol. As controls 4NPA was incubated in the absence of enzyme plus (iii) or minus (i) methanol. The reaction products were lyophilised, resuspended in D<sub>2</sub>O and analysed by <sup>1</sup>H-NMR. The signal corresponding to the anomeric proton of methyl  $\alpha$ -L-arabinofuranose is labelled Me-1 $\alpha$ . Ar-H refers to a proton in the aromatic ring. H-1 is the anomeric proton in 4NPA (i and iii) and arabinose in ii and iv. H-2 (i and iii) is the proton of C2 of the arabinose in 4-NPA. The figure is representative of biological replicates (n = 2).

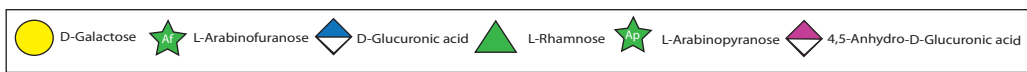

GA-AGP derived heptasaccharide

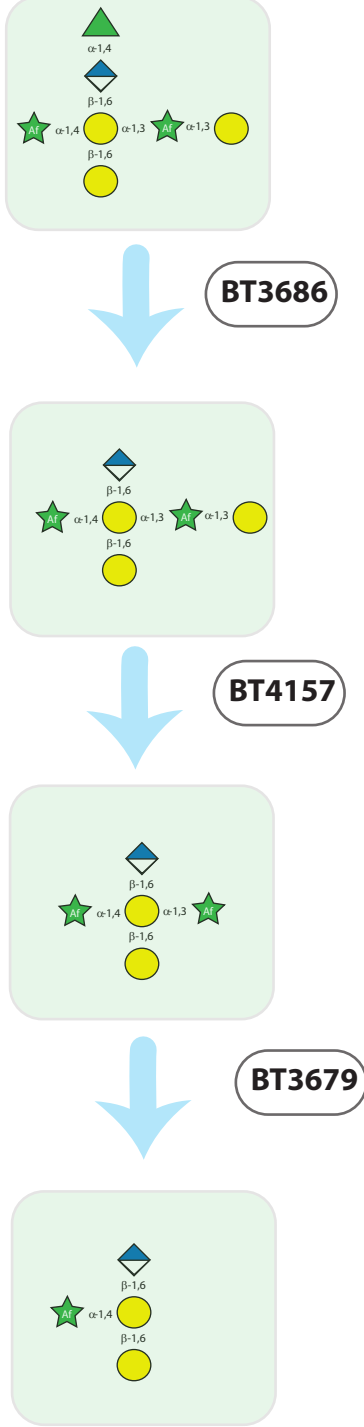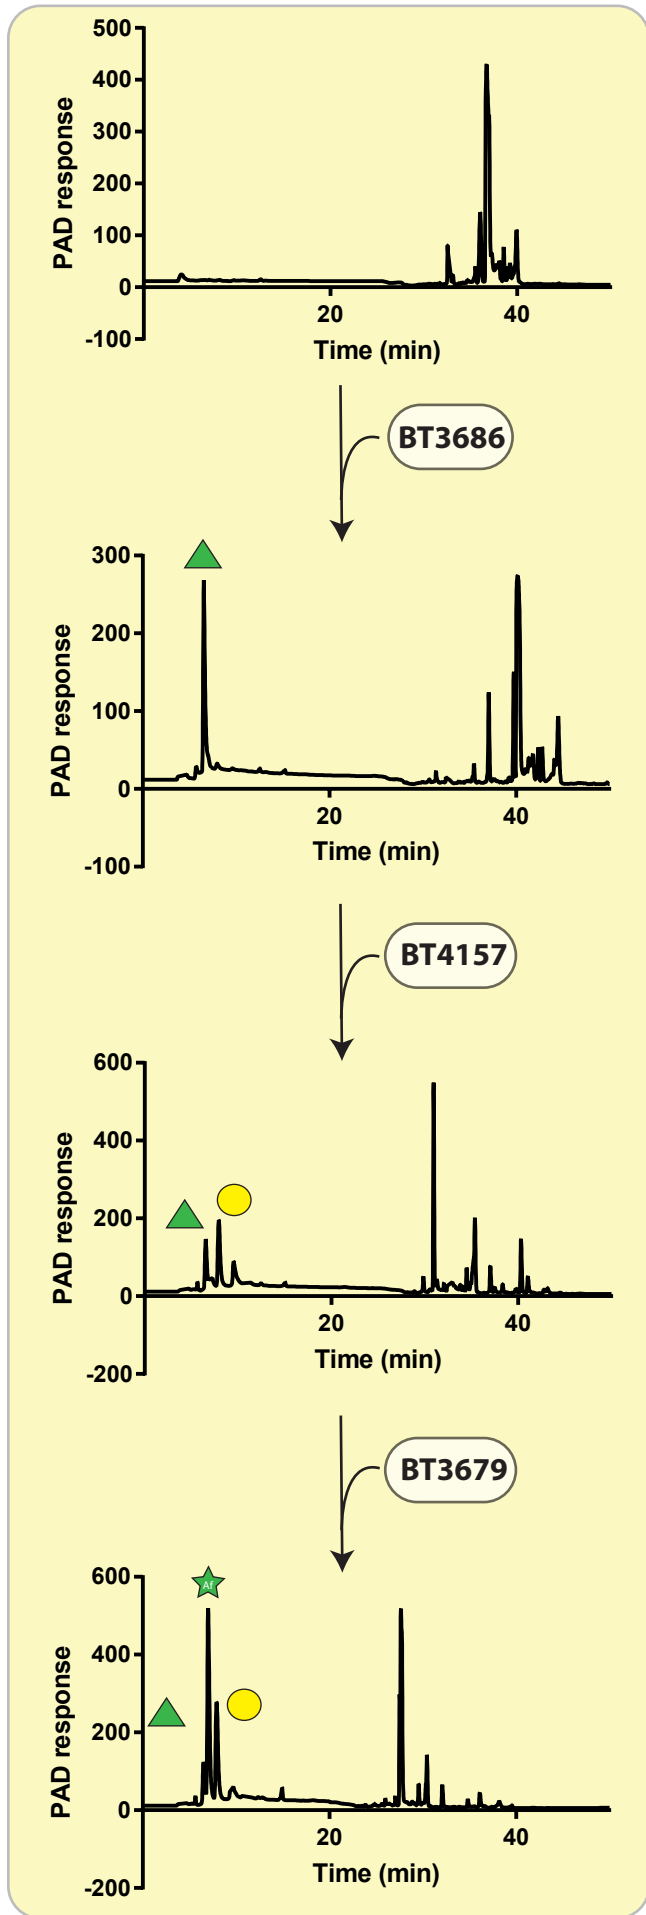

**Supplementary Figure 8. Enzymes active against the GA-AGP derived heptasacchride.** The heptasaccharide substrate was released from GA-AGP by the exo- $\beta$ -1,3-galactosidase BT0265 and then purified by size exclusion chromatography. Individual *B. theta*taomicron enzymes (1  $\mu$ M) were incubated with the glycan (5 mM) for 16 h at 37  $^{\circ}$ C in 20 mM sodium phosphate buffer, pH 7.0. Monosaccharides and oligosaccharides generated were identified by HPAEC-PAD. BT4157 is a non-specific  $\alpha$ -galactosidase derived from RGI-PUL25. The example presented here is representative of biological replicates (n = 2).

**a**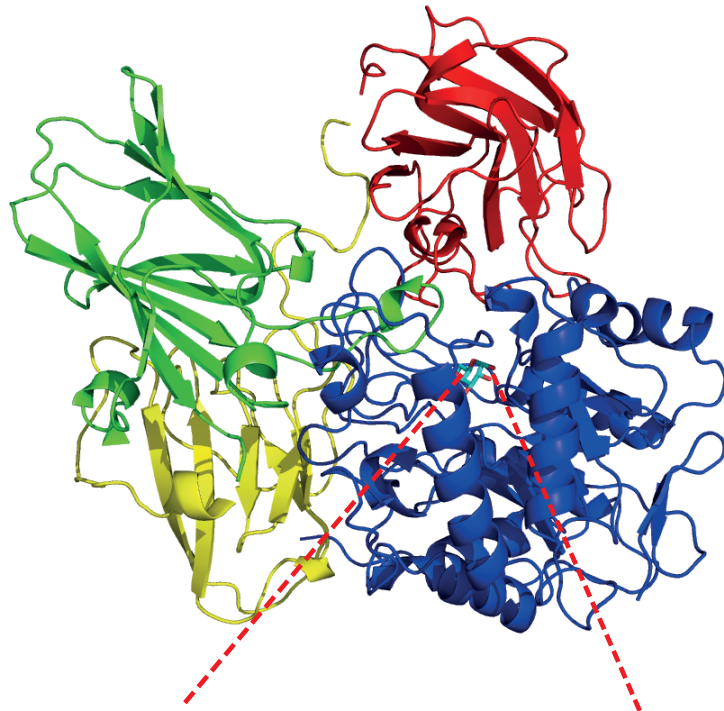**b**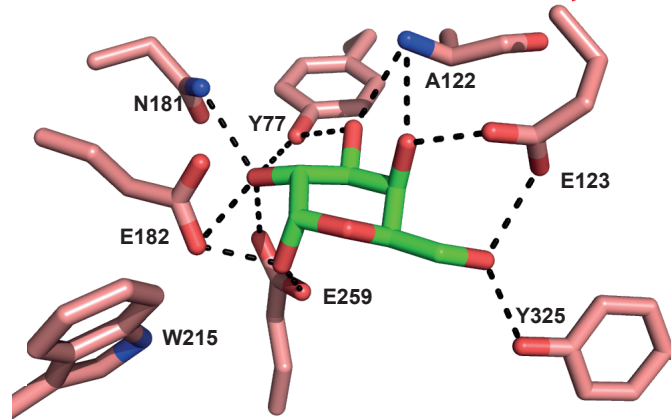**c**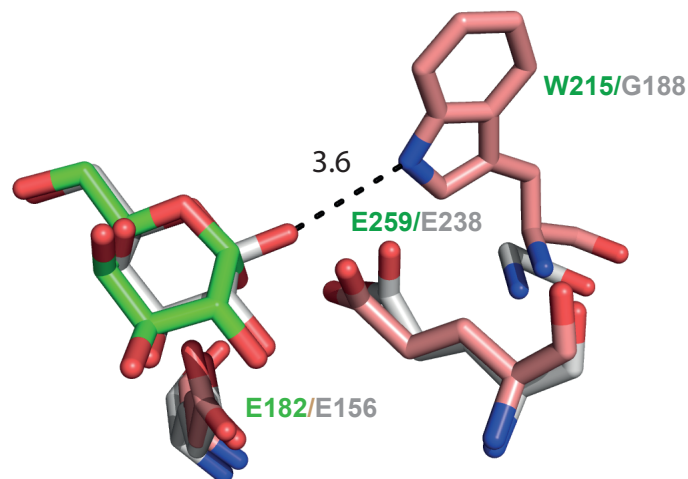

**Supplementary Figure 9. Crystal structure of BT0290 (PDB 6EON).** **a**, schematic of BT0290 in which the N-terminal TIM barrel catalytic domain as blue, followed by the three  $\beta$ -sandwich domains coloured green, yellow and red from the N- to C-termini. **b**, the active site amino acids of BT0290 (carbons coloured salmon pink) that interact with galactose (carbons in green) are shown with polar contacts depicted by broken black lines. The electron density map ( $2F_o - F_c$ ) of the galactose is shown in blue mesh at  $1.5^\circ$ . **c**, an overlay of the structure of BT0290 (amino acids coloured salmon pink and galactose blue) with the Streptococcus  $\beta$ 1,3-galactosidase BgaC (PDB code 4EBC; amino acids shown in light grey and galactose in salmon pink) showing the catalytic acid base and nucleophile in the active site, and BT0290 Trp215, the proposed specificity determinant, in the +1 subsite. The distance (3.6 Å) between the tryptophan and O1 of  $\beta$ -galactose in the active site is shown as a dashed line.

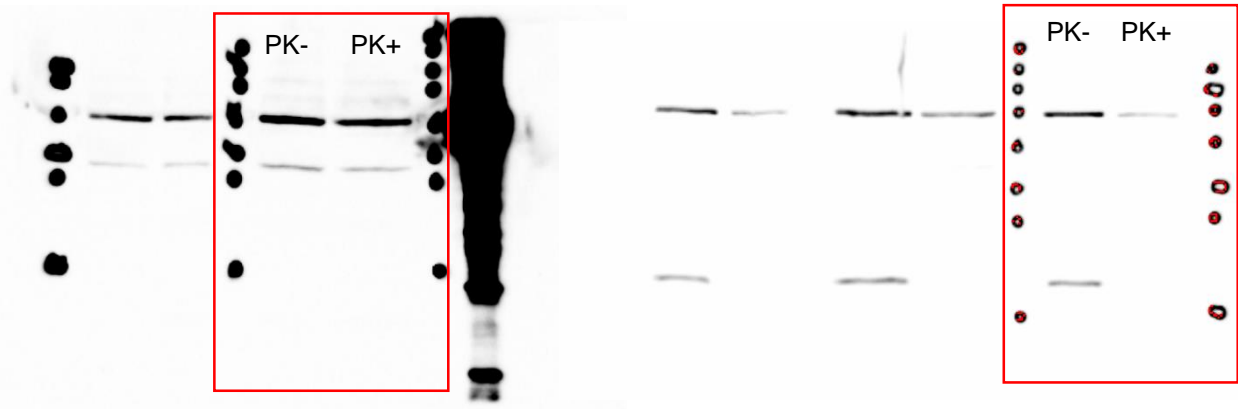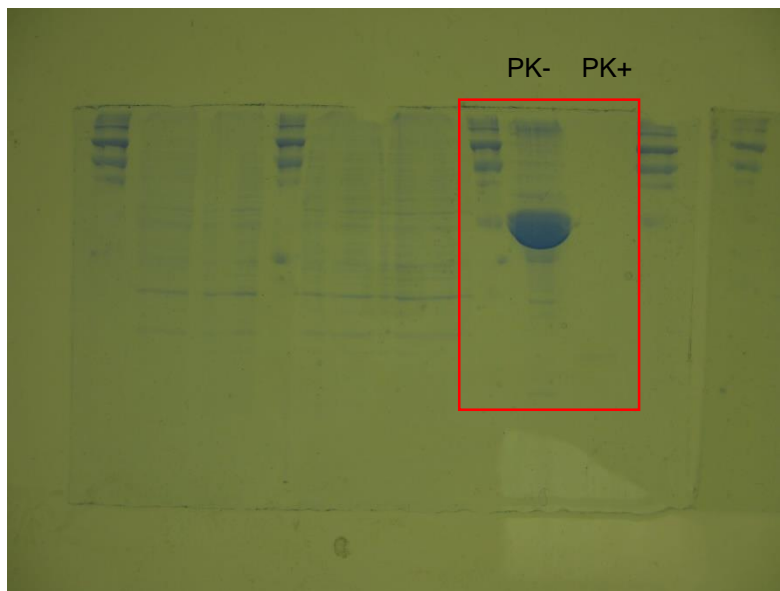

**Supplementary Figure 10. Western blot of BT2064 and BT4662 and SDS-PAGE gel of purified BT0264.** Western blot detection of **a** BT0264 and **b** a known surface enzyme (BT4662) in LA-AGP/heparin cultured *B. thetaiotaomicron*, after treatment of the bacterial cells with proteinase K (PK+) or untreated (PK-). Purified recombinant BT0264 was also subjected to proteinase treatment to verify the enzyme is sensitive to the proteinase. The regions of the gels presented in **Figure 5a**, where the lanes are fully annotated, are indicated by red rectangles.

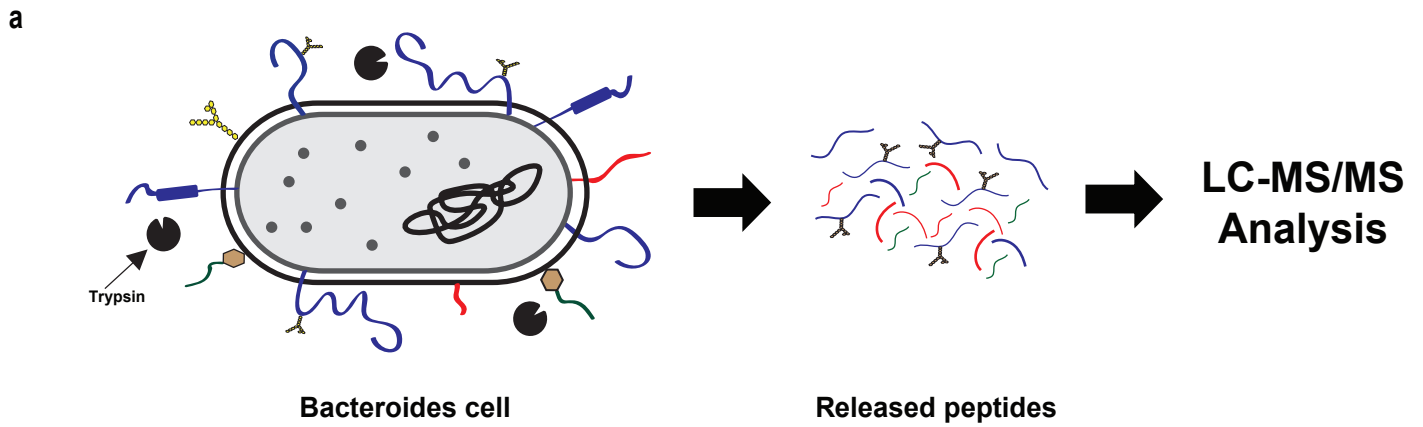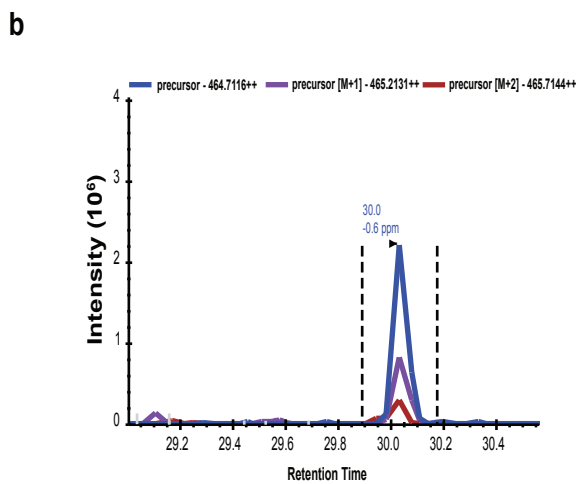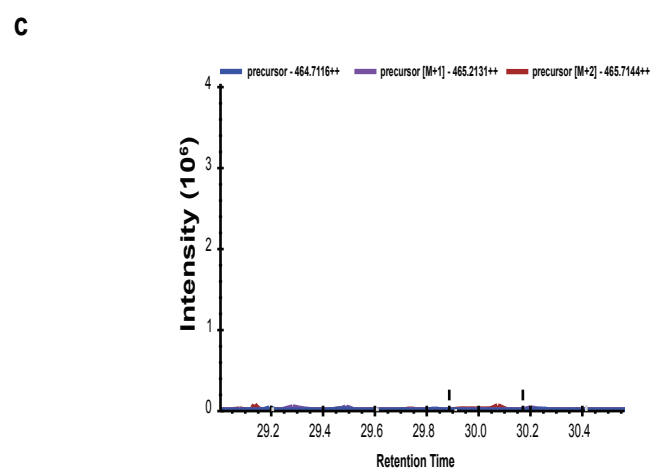

**d**

```

> Baccell_00844
MKNKIKIIVALCVAACSITFSACDEDNDFGYNGKLSLNYLGIKQASEIWDGAQCNIVTALKEPQEGEVQKVKNFNRYRLNLALYQNRKAEKDA
TVDLVIASDSLKKAIALVGTSSVYTVYADAELLPEEYNNLSASKMELSAGCKKSEEVELNVYSSKLIALVQDEWKDVTFLVPVQIQNSTSYSIND
KTNTMMFFFNVTYVDPGEEYFADGEGVPDDHELEGGYKLVWHDEFNGTGAPNEMWR[YEEGFQR][NEEDQWYK]KENVEMKKNALVFTAK
QER[VKNPNYNPNATGGNSWK]QTREA EYTSACVVAQNKYAFKYGKLVVRAKIPIEQGGWPAIWSTGNWYEWPLGGEIDFLEFYKKIHANL
CWGGNKR[WDGSWNSANYPITDFTSK]DAKWA EKYHVWMMDWDEKYIRIYLLDDVLLNETDLSTTYNKGDHGAGEGGYINPYSNDLEGFG
QLMMLNLAIGGSNGR[PIEATFPLEYR]VDYVRVYQKK
  
```

**Supplementary Figure 11. Surface proteome (surfome) analysis to determine BACCELL\_00844 subcellular protein localization in *B. thetaiotaomicron*.** (a) Experimental workflow used for analysis of the *Bacteroides thetaiotaomicron* surfome. Extracted ion chromatograms of the YEEGFQR tryptic peptide, which is in the BACCELL\_00844-expressing *B. thetaiotaomicron* strain (b), but absent in wild-type *B. thetaiotaomicron* (c). (d) Sequence of Baccell\_00844 with the five peptides, identified by mass spectrometry, that are unique to this enzyme indicated in red between square brackets. The data in b and c are examples of independent replicates (n = 2).

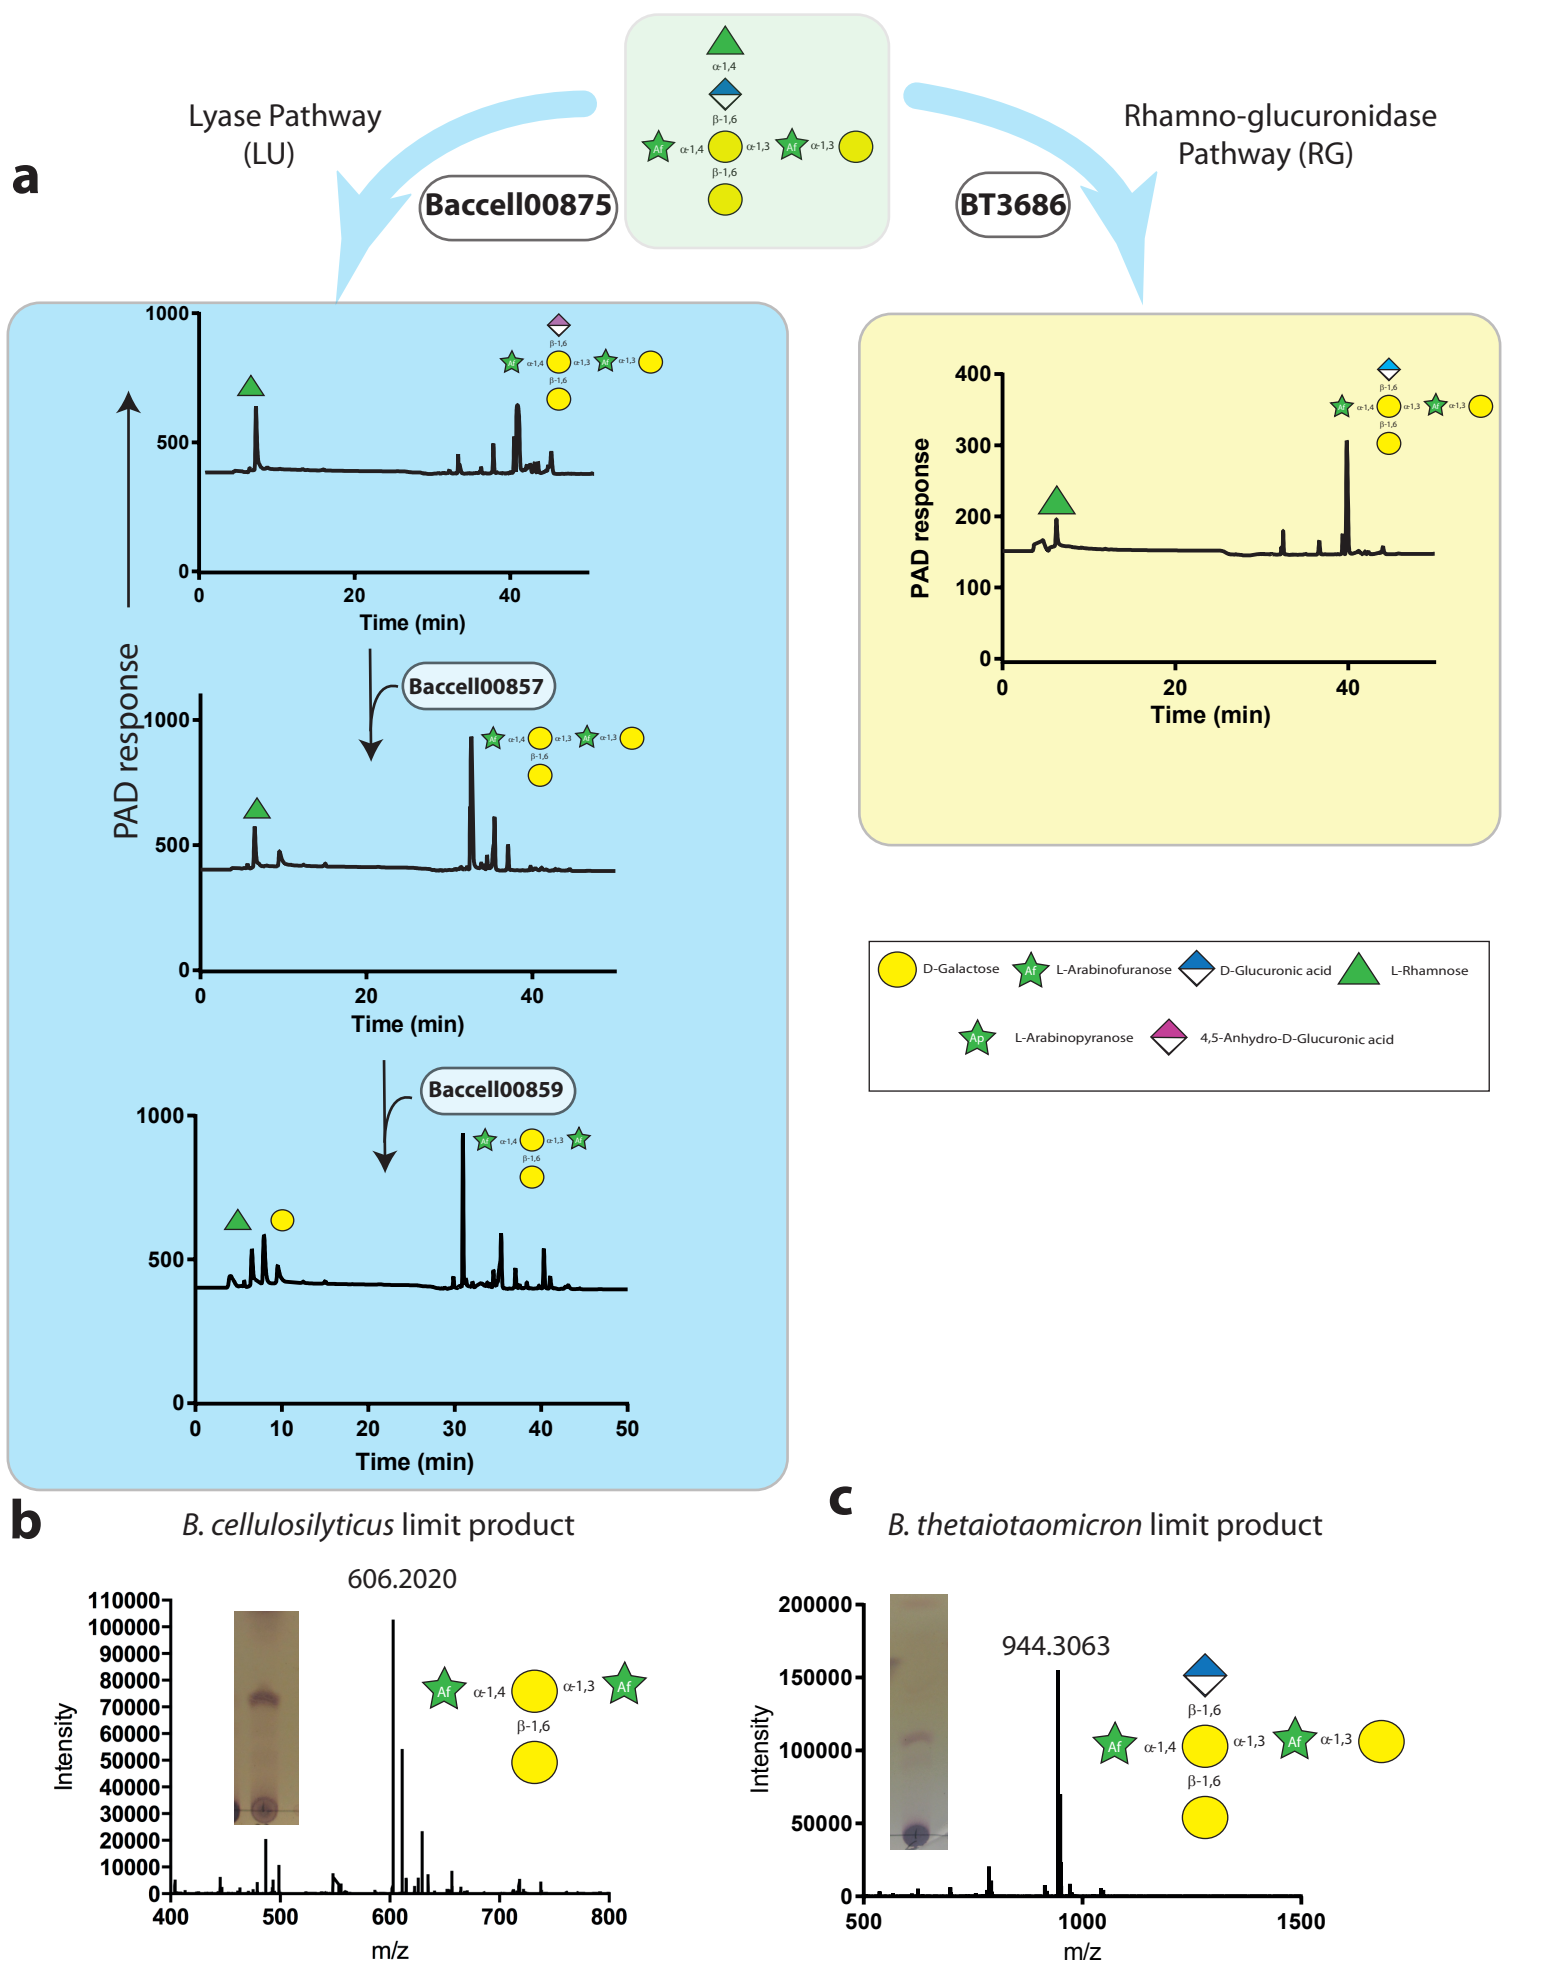

**Supplementary Figure 12. Degradation pathways of GA-AGP that resulted in the limit products generated by *B. thetaiotaomicron* and *B. cellulosilyticus*.** **a**, the enzyme systems that degrade the heptasaccharide in GA-AGP that resulted in the limit products observed in the two organisms. **b, c**, structures of the limit products produced by *B. thetaiotaomicron* and *B. cellulosilyticus*, respectively. The smaller product generated by *B. cellulosilyticus* reflects the use of the LU pathway in which the GH105 unsaturated glucuronidase Baccell00857 can cleave its target linkage when Gal at the +1 subsite of the enzyme is decorated at O4. The  $\alpha$ -Gal is released from the oligosaccharide by the GH97  $\alpha$ -galactosidase Baccell00859, which is encoded by the *B. cellulosilyticus* AGP PUL. The data in are examples of biological replicates (**a**,  $n = 4$ ; **b** and **c**,  $n = 2$ ).

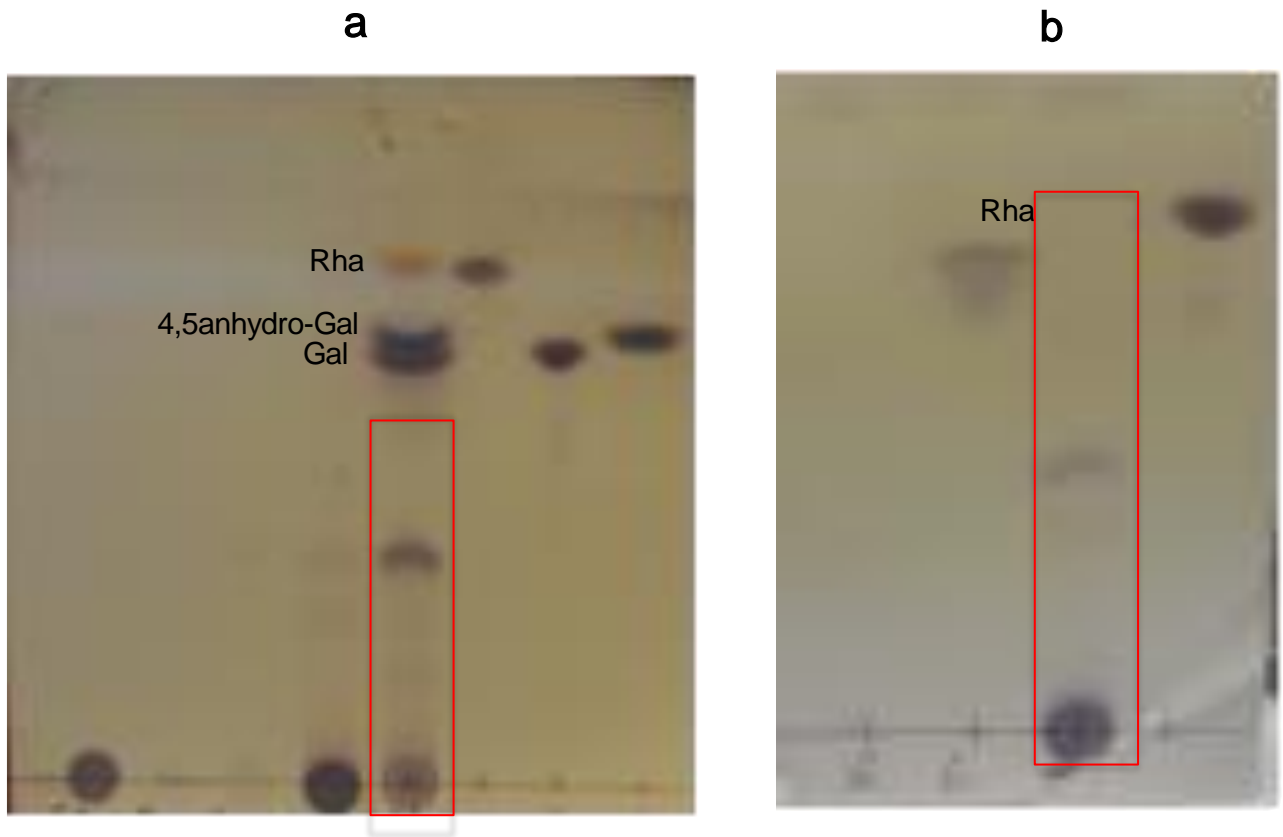

**Supplementary Figure 13. Full TLC plate showing the band corresponding to the GA-AGP- derived limit products subjected to mass spectrometry.** The heptasaccharide shown in **Supplementary Fig. 12a** was incubated with cell free extracts of **(a)** *B. cellulosilyticus* and **(b)** *B. thetaiotaomicron* for 16 h at room temperature. The region of the two TLC plates containing the single oligosaccharide species displayed in **Supplementary Fig. 12b** and **12c** are identified by a red rectangle. The monosacchrides gerated by the cell-free extracts are identified as rhamose (Rha), galactose (Gal) and 4,5anhydro-galactose (4,5anhydro-Gal).



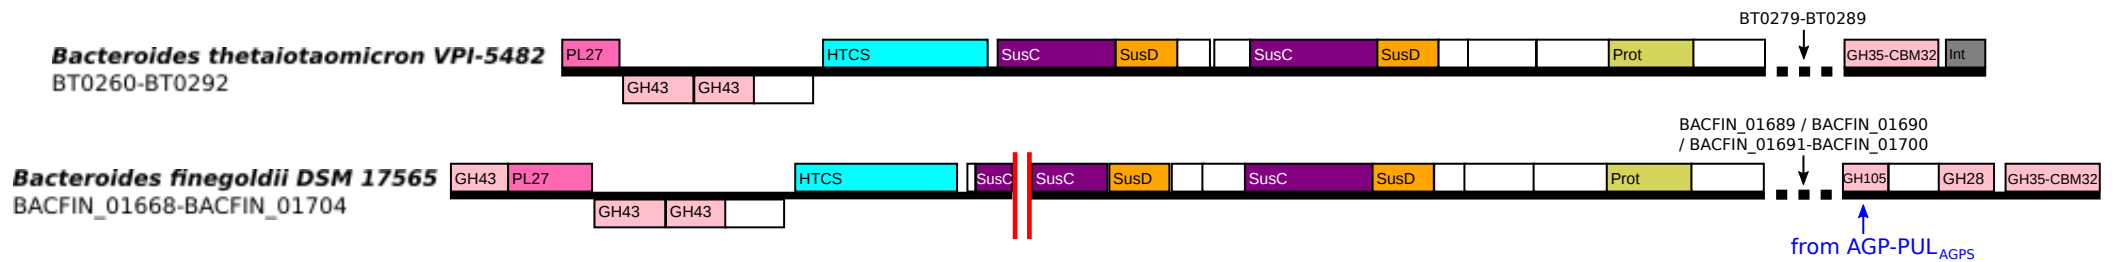

**Supplementary Figure 14. Genomic view of *B. thetaiotaomicron* PUL<sub>AGPL</sub> and microsyntenic regions in the species studied in this work.** Protein-coding genes are depicted by colored rectangles to highlight the following functional modules: GHs in light pink, PLs in dark pink, HTCSs regulators in cyan, SusC transporters in purple, SusD outer membrane proteins in orange, peptidases in gold, integrases in grey. Genes are represented either above or below a central black line to represent the coding strand. The central black line is dotted to indicate a large genomic region of unknown genes (locus tags indicated above) which has not been represented. When PUL genes are split across several scaffolds, due to incomplete genome assembly, the scaffold limits are indicated by vertical red bars. A blue arrow shows the translocation of a gene from PUL<sub>AGPS</sub> into the *B. finegoldii* PUL.

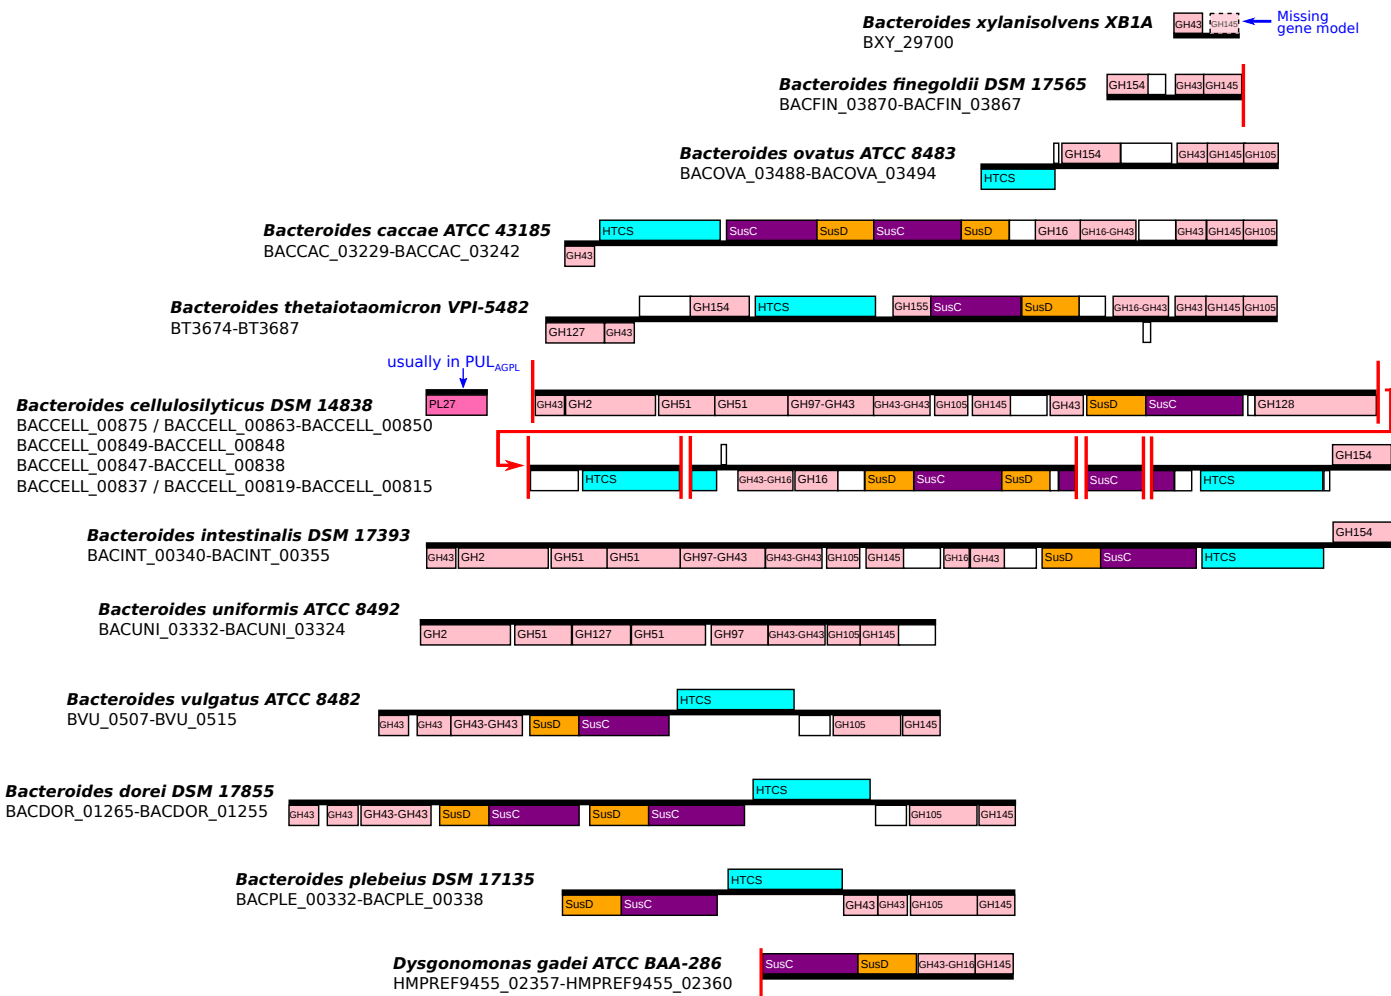

**Supplementary Figure 15. Genomic view of *B. thetaiotaomicron* PUL<sub>AGPLs</sub> and microsyntenic regions in the species studied in this work.** Protein-coding genes are depicted by colored rectangles to highlight the following functional modules: GHs in light pink, PLs in dark pink, HTCSs regulators in cyan, SusC transporters in purple, SusD outer membrane proteins in orange. Genes are represented either above or below a central black line to represent the coding strand. When PUL genes are split across several scaffolds, due to incomplete genome assembly, the scaffold limits are indicated by vertical red bars. *B. cellulosilyticus* DSM 14838 genomic fragments were ordered according to *B. cellulosilyticus* WH2 complete assembly (not shown). A blue arrow shows the translocation of a gene usually found in PUL<sub>AGPL</sub> (in *B. thetaiotaomicron* and *B. finegoldii*) close to PUL<sub>AGPLs</sub> in *B. cellulosilyticus* (which do not have a PUL<sub>AGPL</sub>), and a missing gene model in *B. xylanisolvens*. PULs were represented for species that displayed at least two orthologous and microsyntenic CAZymes.
